# Supplementary material for: Halogen (Cl, Br, I) tuning of 3-Methylpiperidine Bismuth Halides for Highly Sensitive, Low-Dose, and Stable X-ray Detection
Source: Research Square preprint supplement (doi:10.21203/rs.3.rs-7601158/v1), 2025-10-08
Supplement: Supplementary file 1 [file 102ca8b2698569ad3ef23d1f.docx]

# Supplementary Information

**Halogen (Cl, Br, I) tuning of 3-Methylpiperidine Bismuth Halides for Highly Sensitive, Low-Dose, and Stable X-ray Detection**

Huayushuo Zhanga, Qian Ma*a, Pan Gaob, Bolong Lia, Xiaoxia Yanga, Chao Lia, Mingming Songa, Zhiwei Houa, Xiaomei Jiang*b

aSchool of Material Science and Engineering, University of Jinan, Jinan 250022, PR China

bSchool of Preventive Medicine Sciences (Institute of Radiation Medicine), Shandong First Medical University & Shandong Academy of Medical Sciences, Jinan 250117, PR China

* To whom correspondence should be addressed.

1. mail: [mse_maq@ujn.edu.cn;](mailto:mse_maq@ujn.edu.cn;) [jiangxiaomei@sdfmu.edu.cn](mailto:jiangxiaomei@sdfmu.edu.cn)


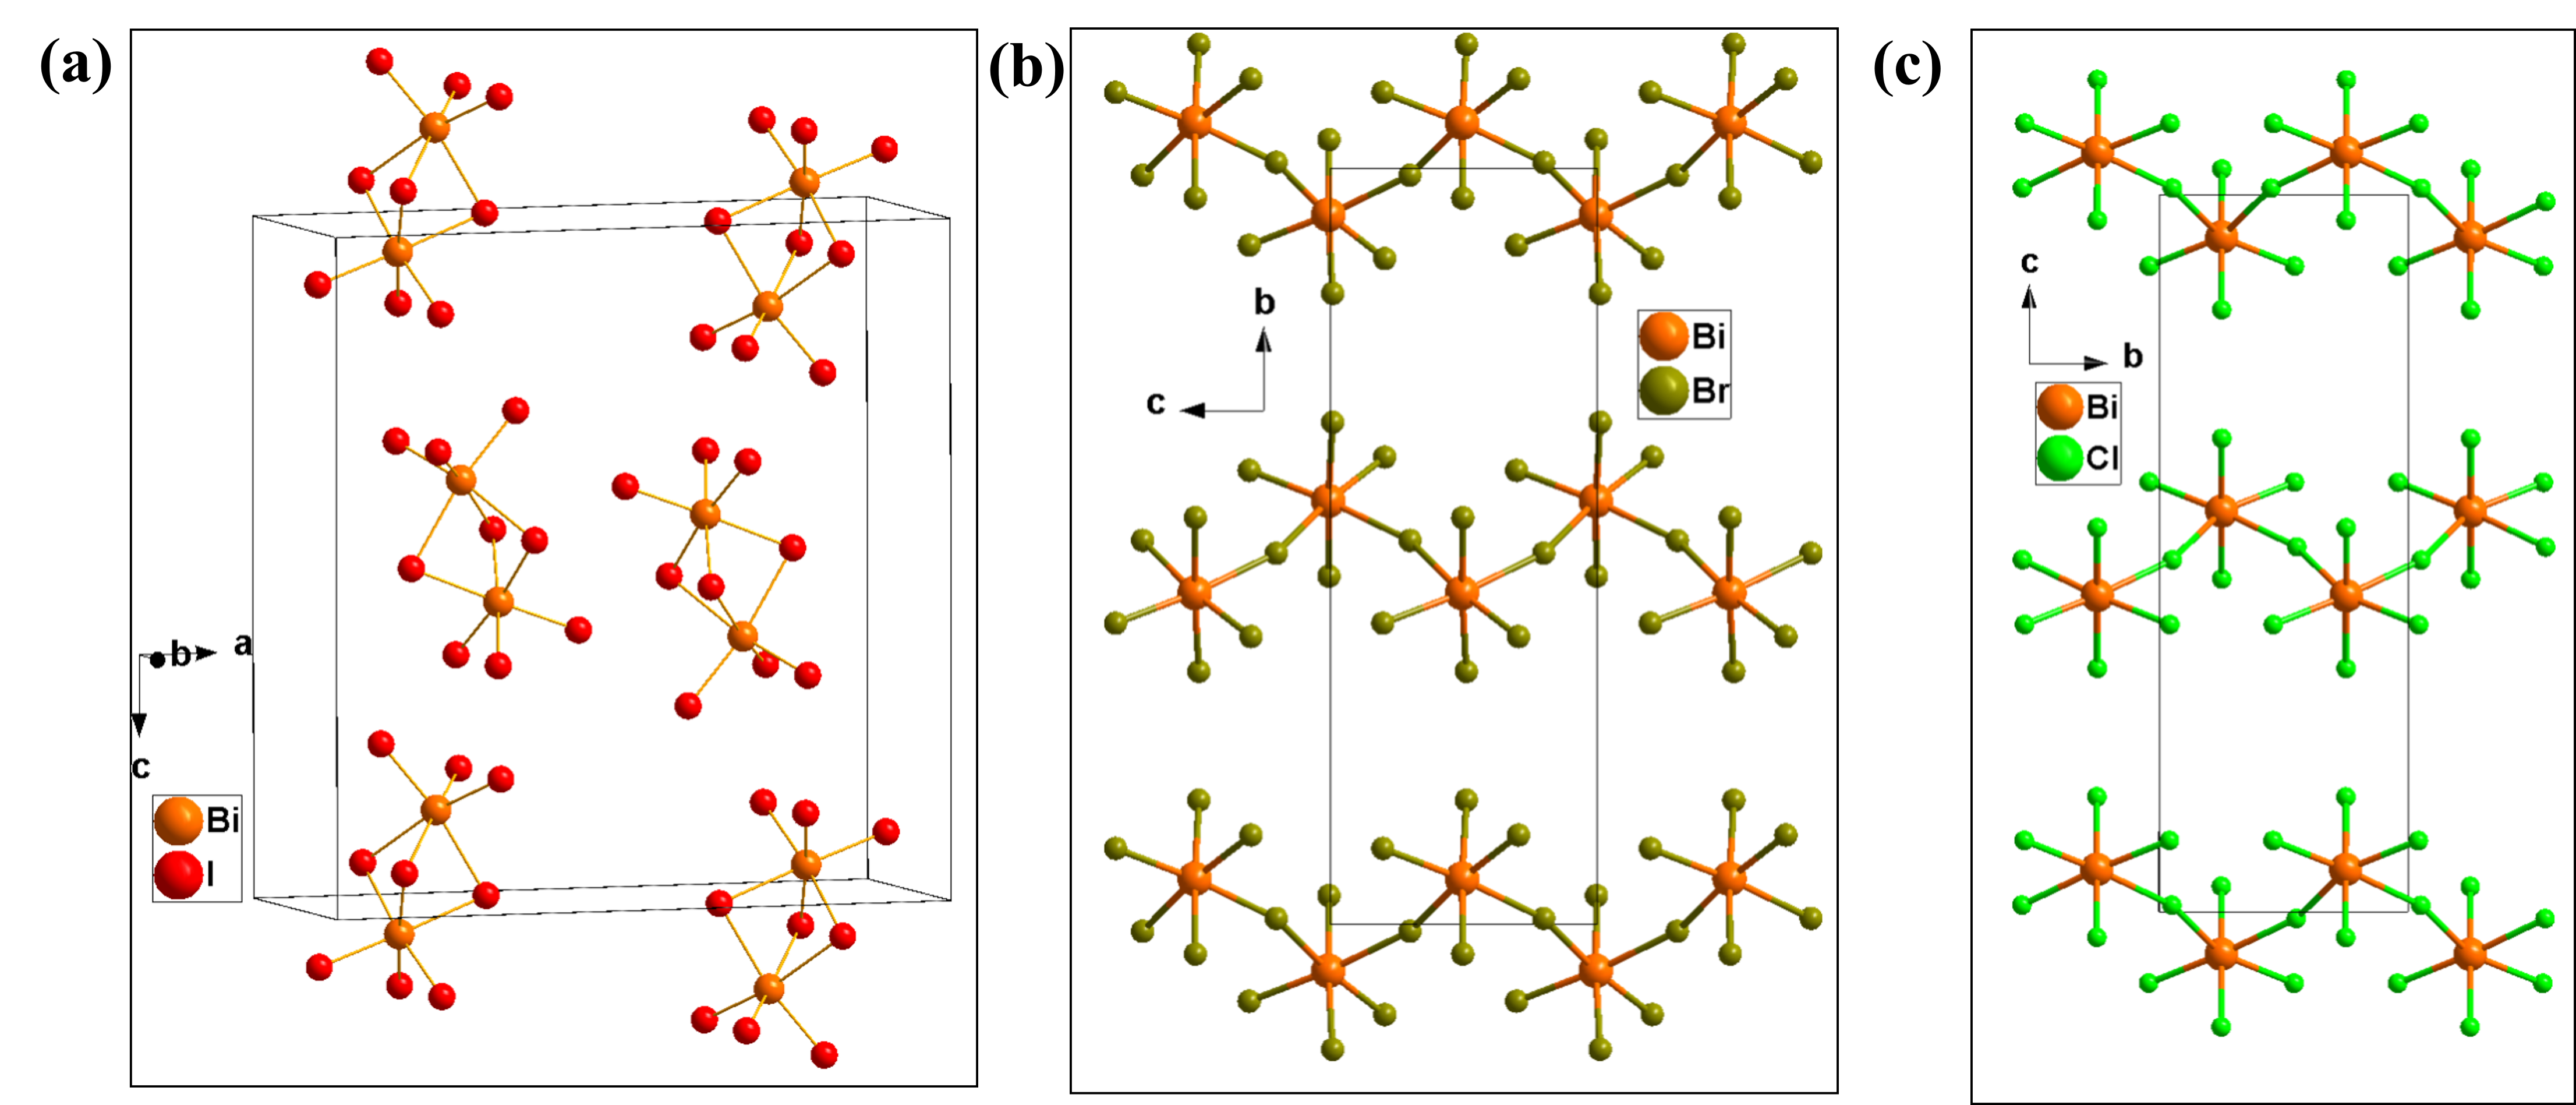


**Fig S1.** Schematic illustration of single crystal structure of (a)0D (C6H14N)3Bi2I9(1), (b) 1D (C6H14N)2BiBr5 and (c)1D (C6H14N)2BiCl5. Organic molecules were omitted to enable a clearer view of the inorganic framework.

**

**

**Fig S2.** XPS spectra of C 1s for (C6H14N)3Bi2I9.

**
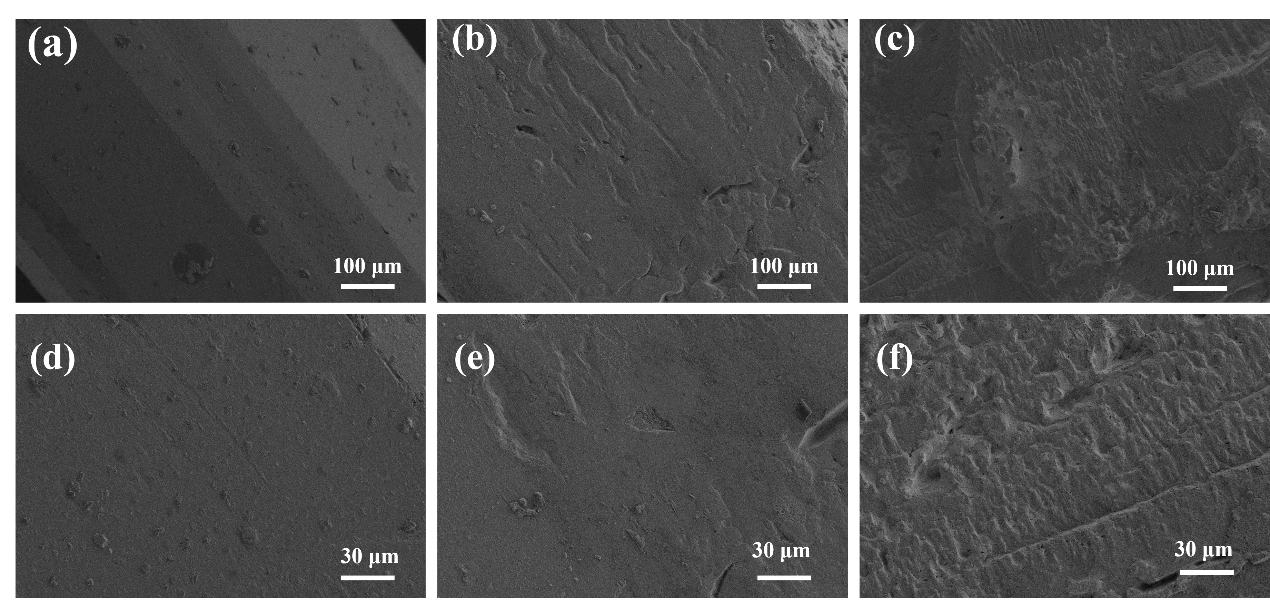
**

**Fig S3.** SEM images of (a)&(d) (C6H14N)3Bi2I9, (b) & (e) (C6H14N)2BiBr5, and (c) & (f) (C6H14N)2BiCl5.


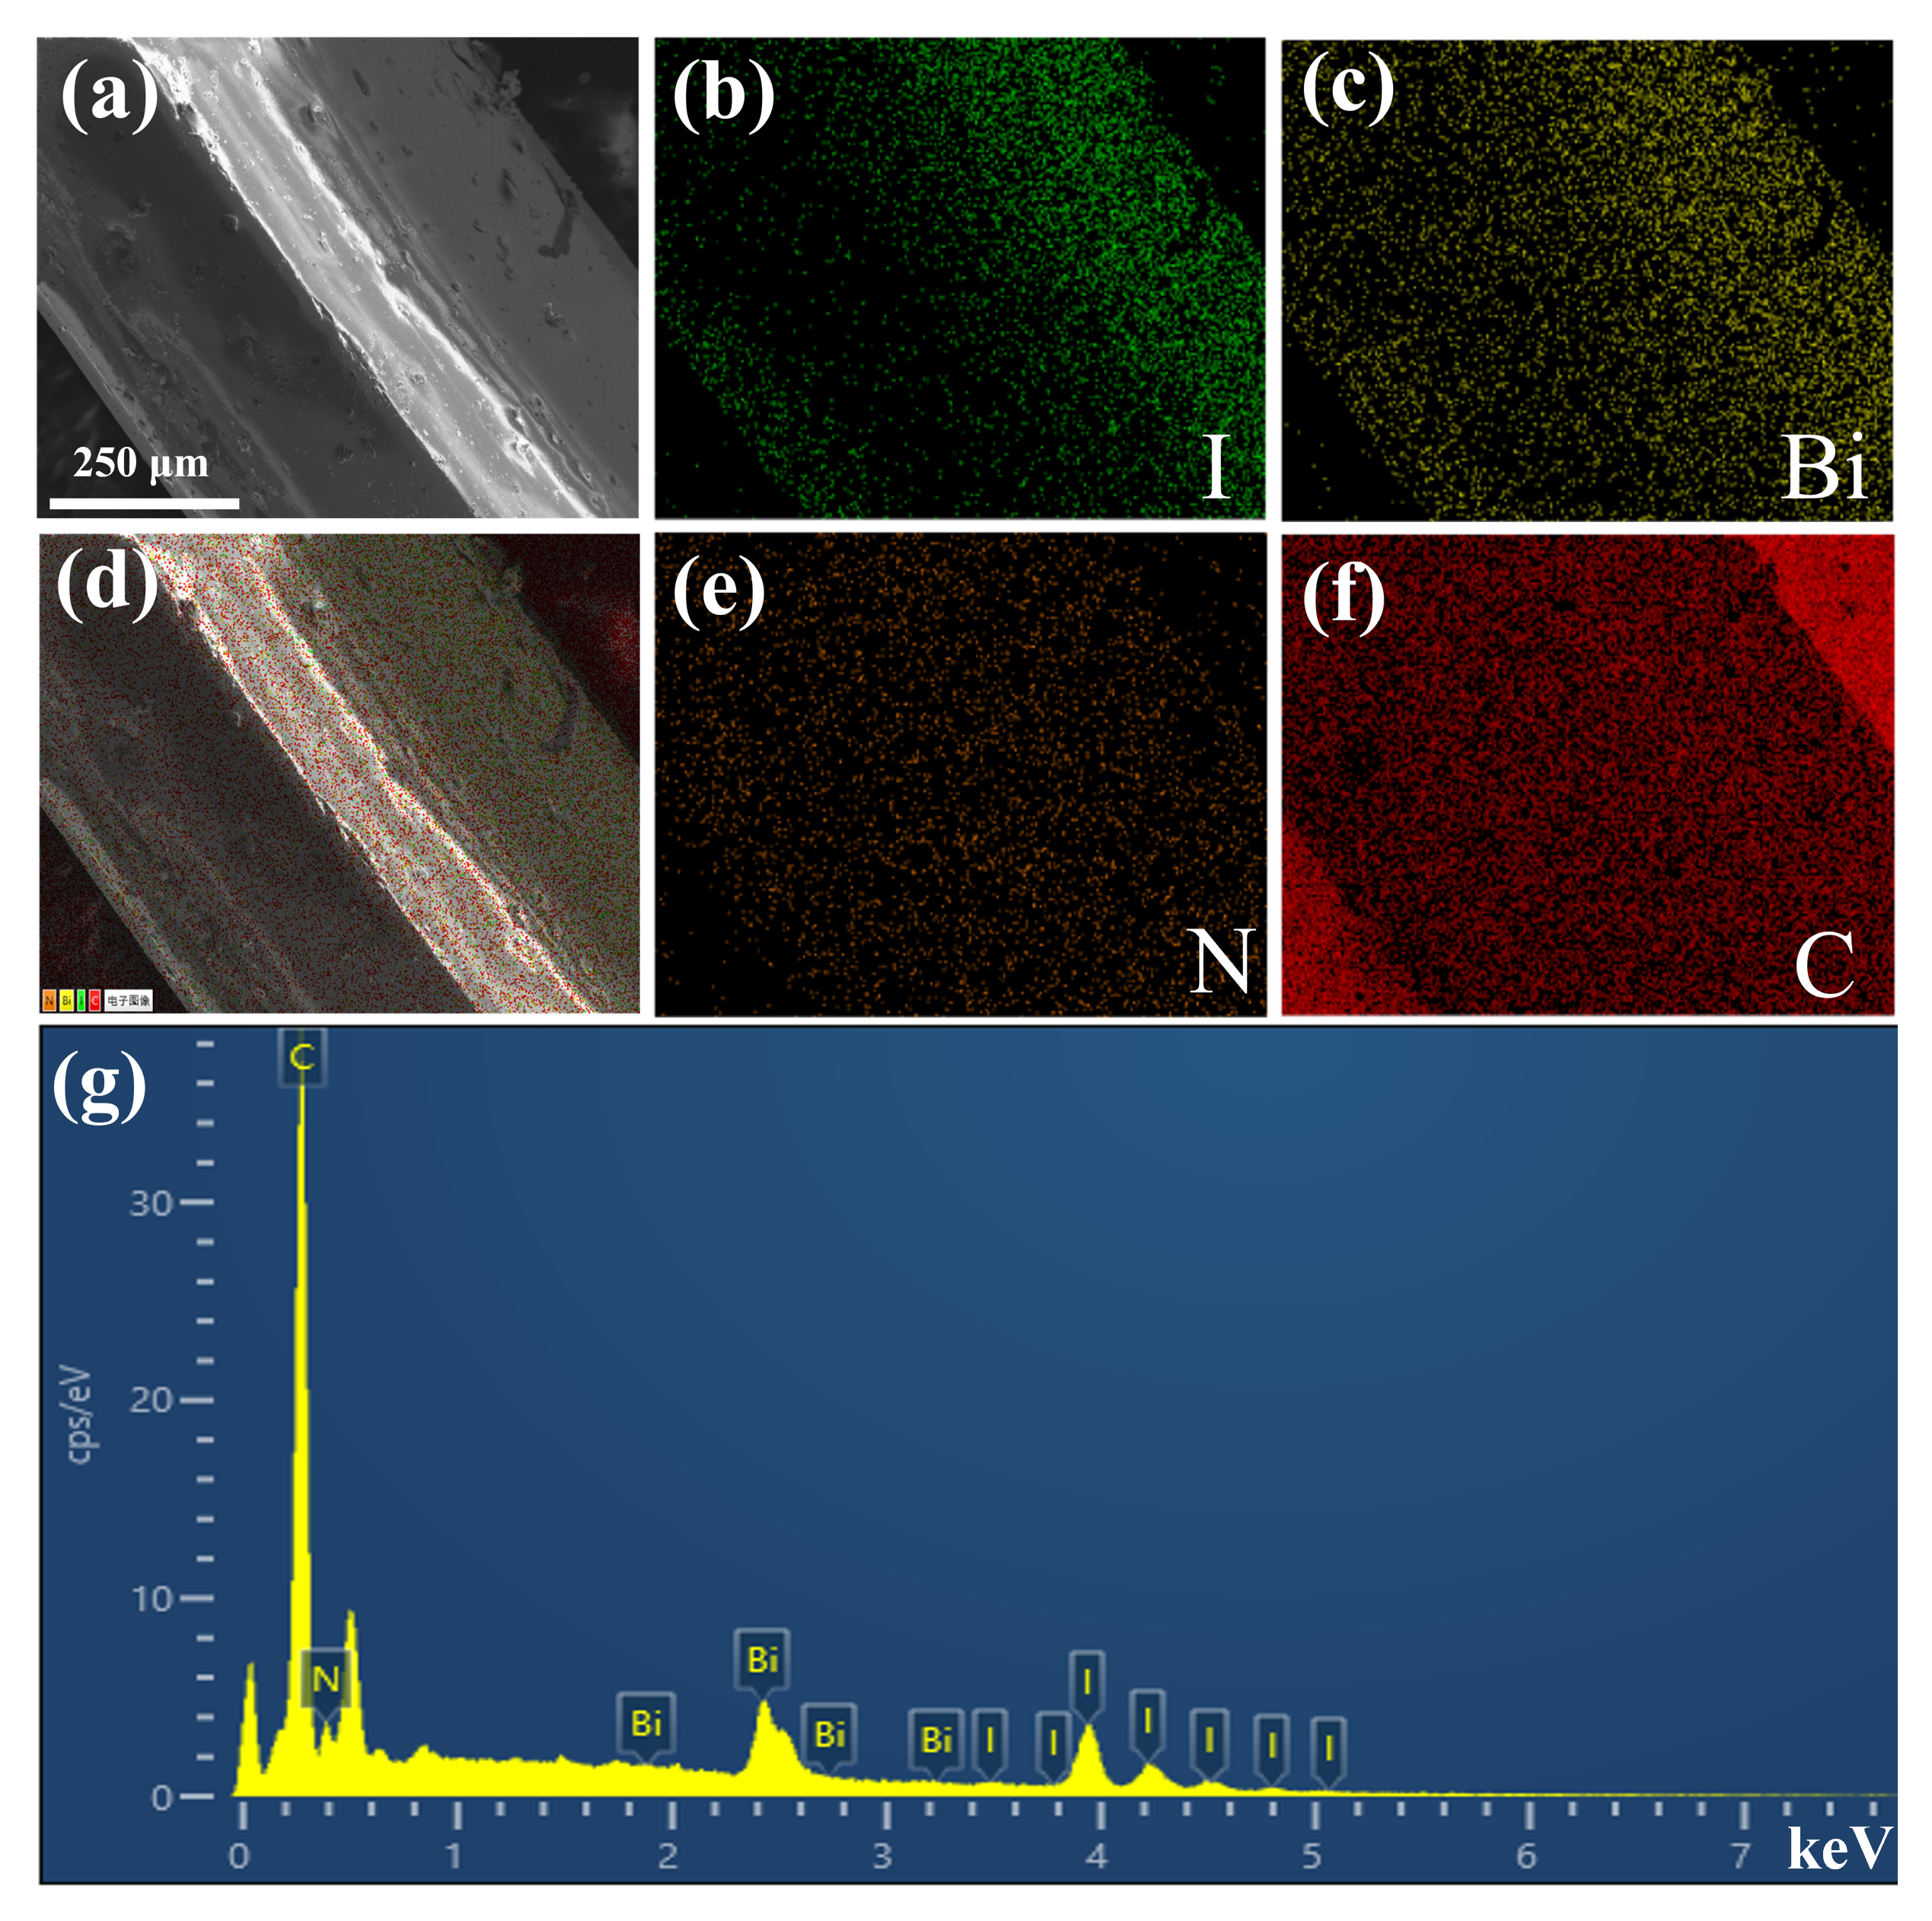


**Fig S4.** (a-f) The elemental mappings and (g) EDS spectrum of (C6H14N)3Bi2I9.

**
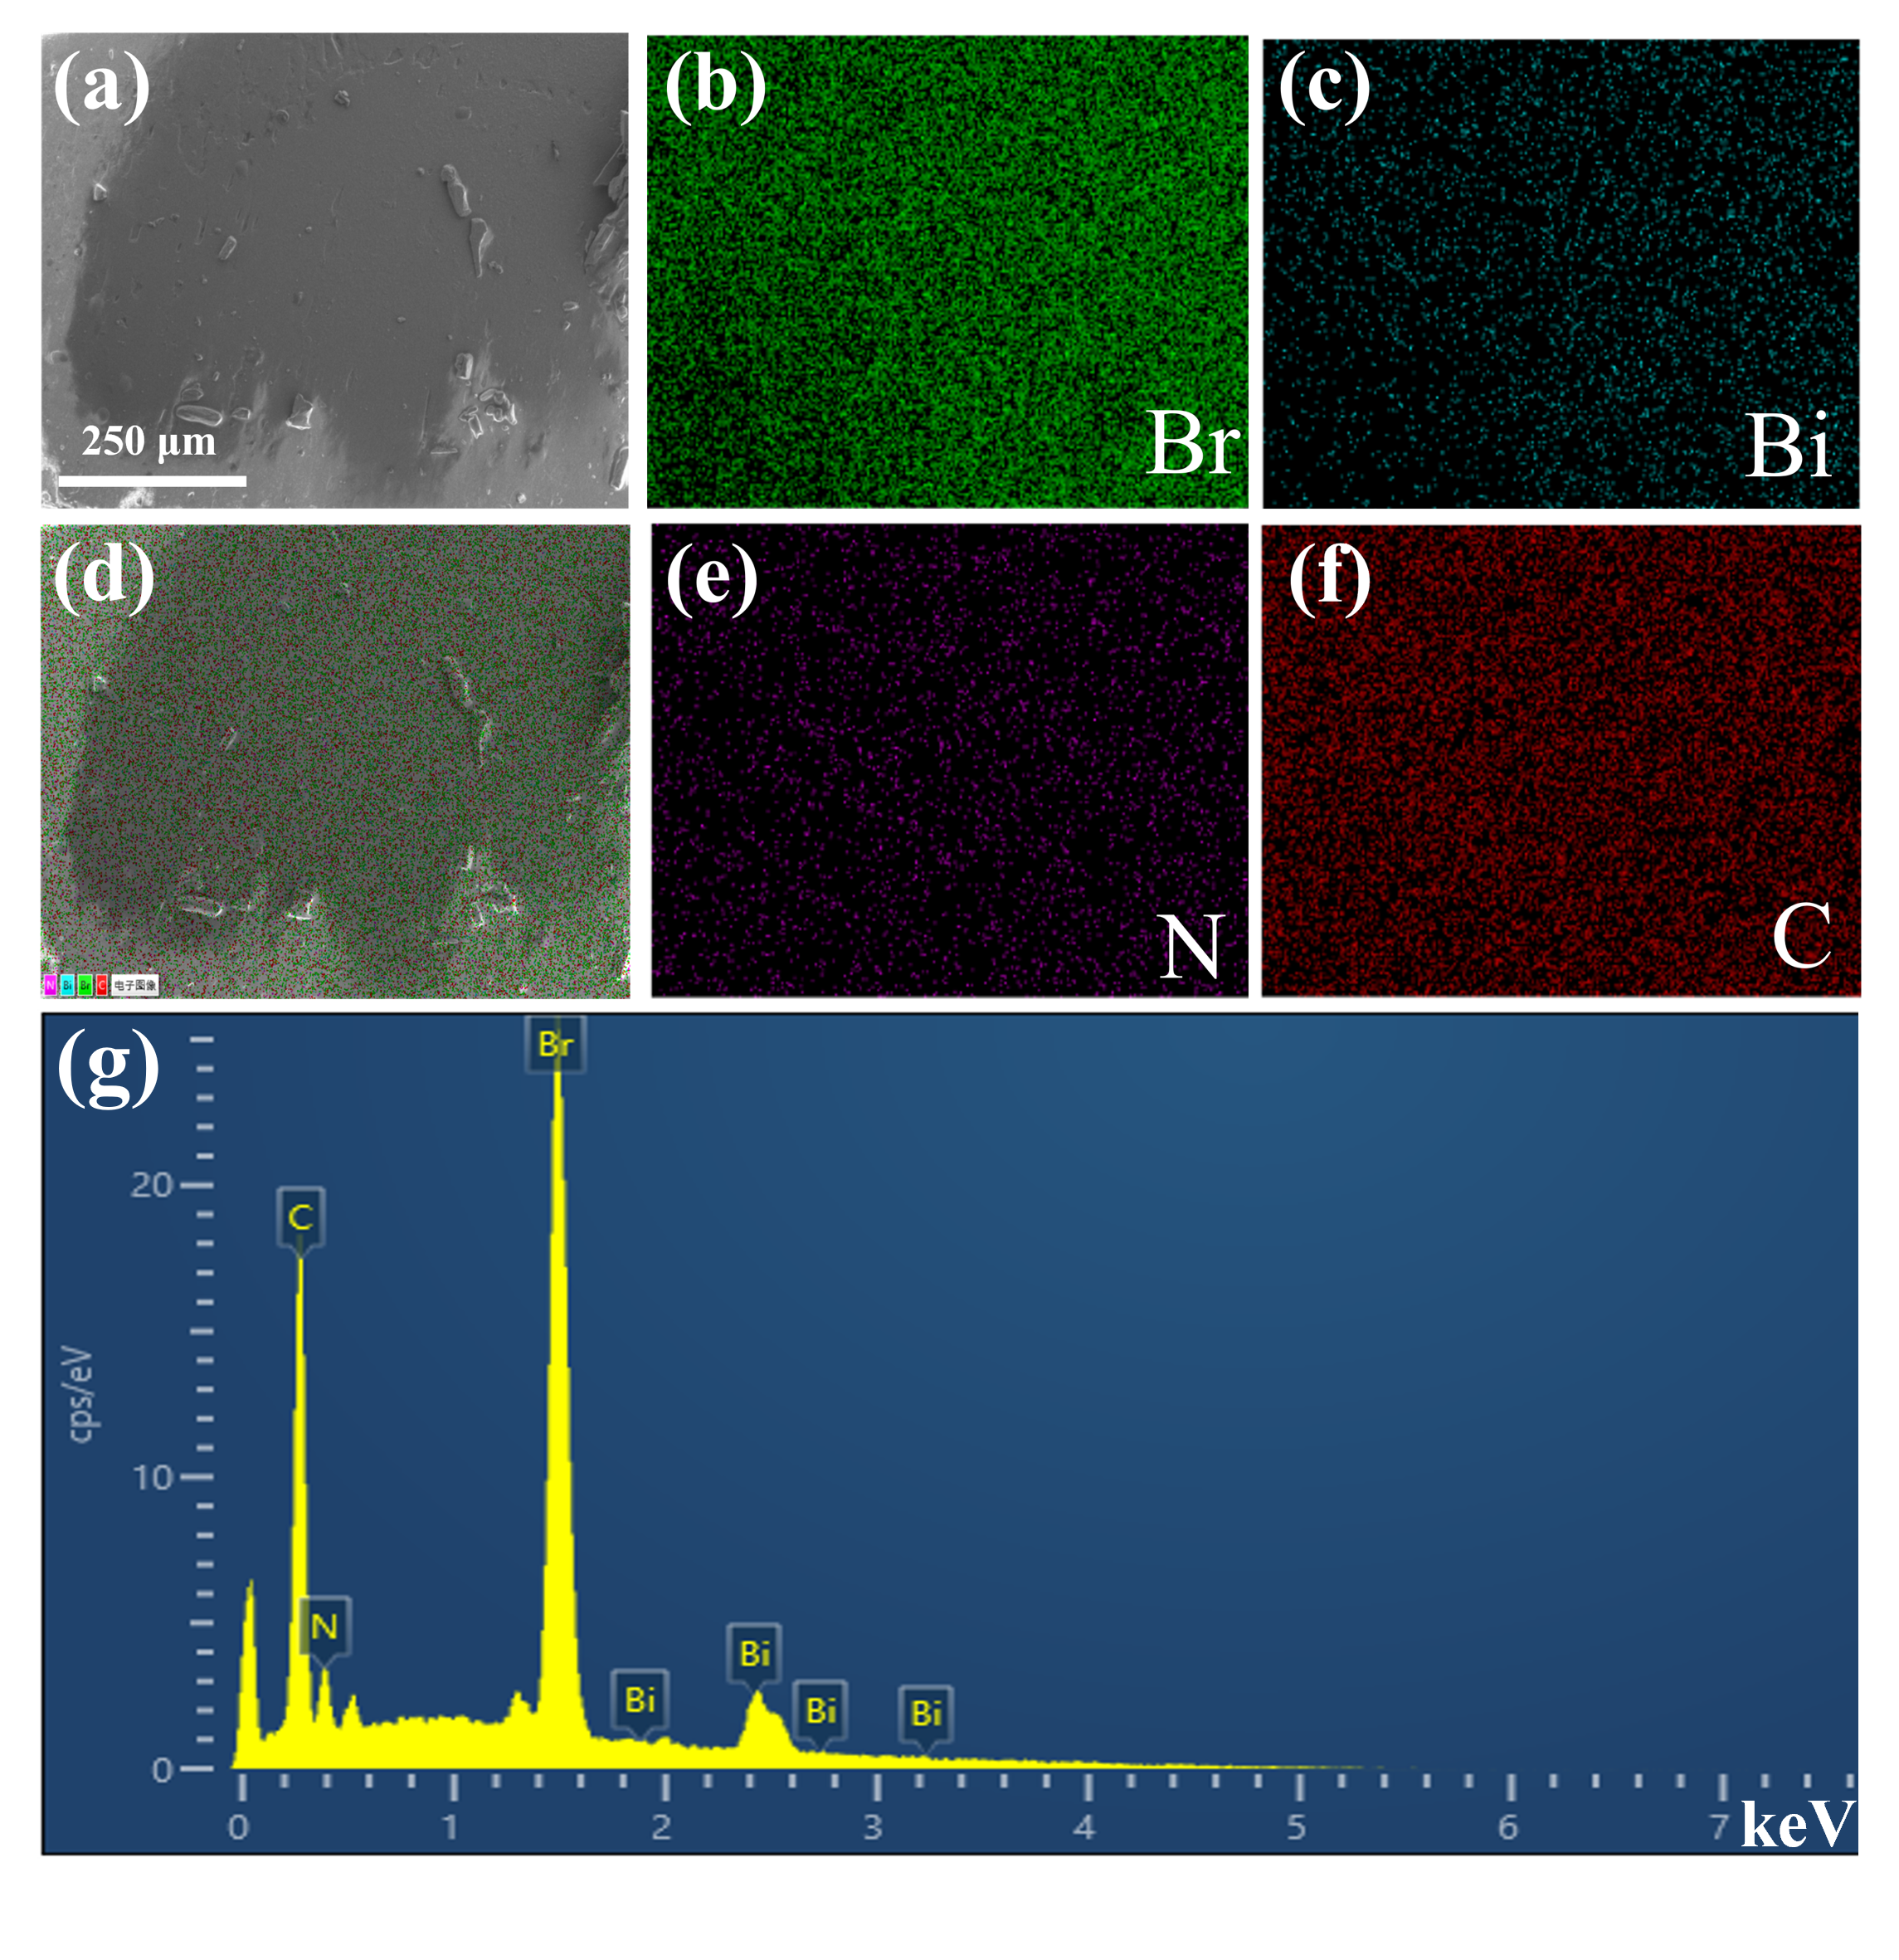
**

**Fig S5.** (a-f) The elemental mappings and (g) EDS spectrum of (C6H14N)2BiBr5.

**
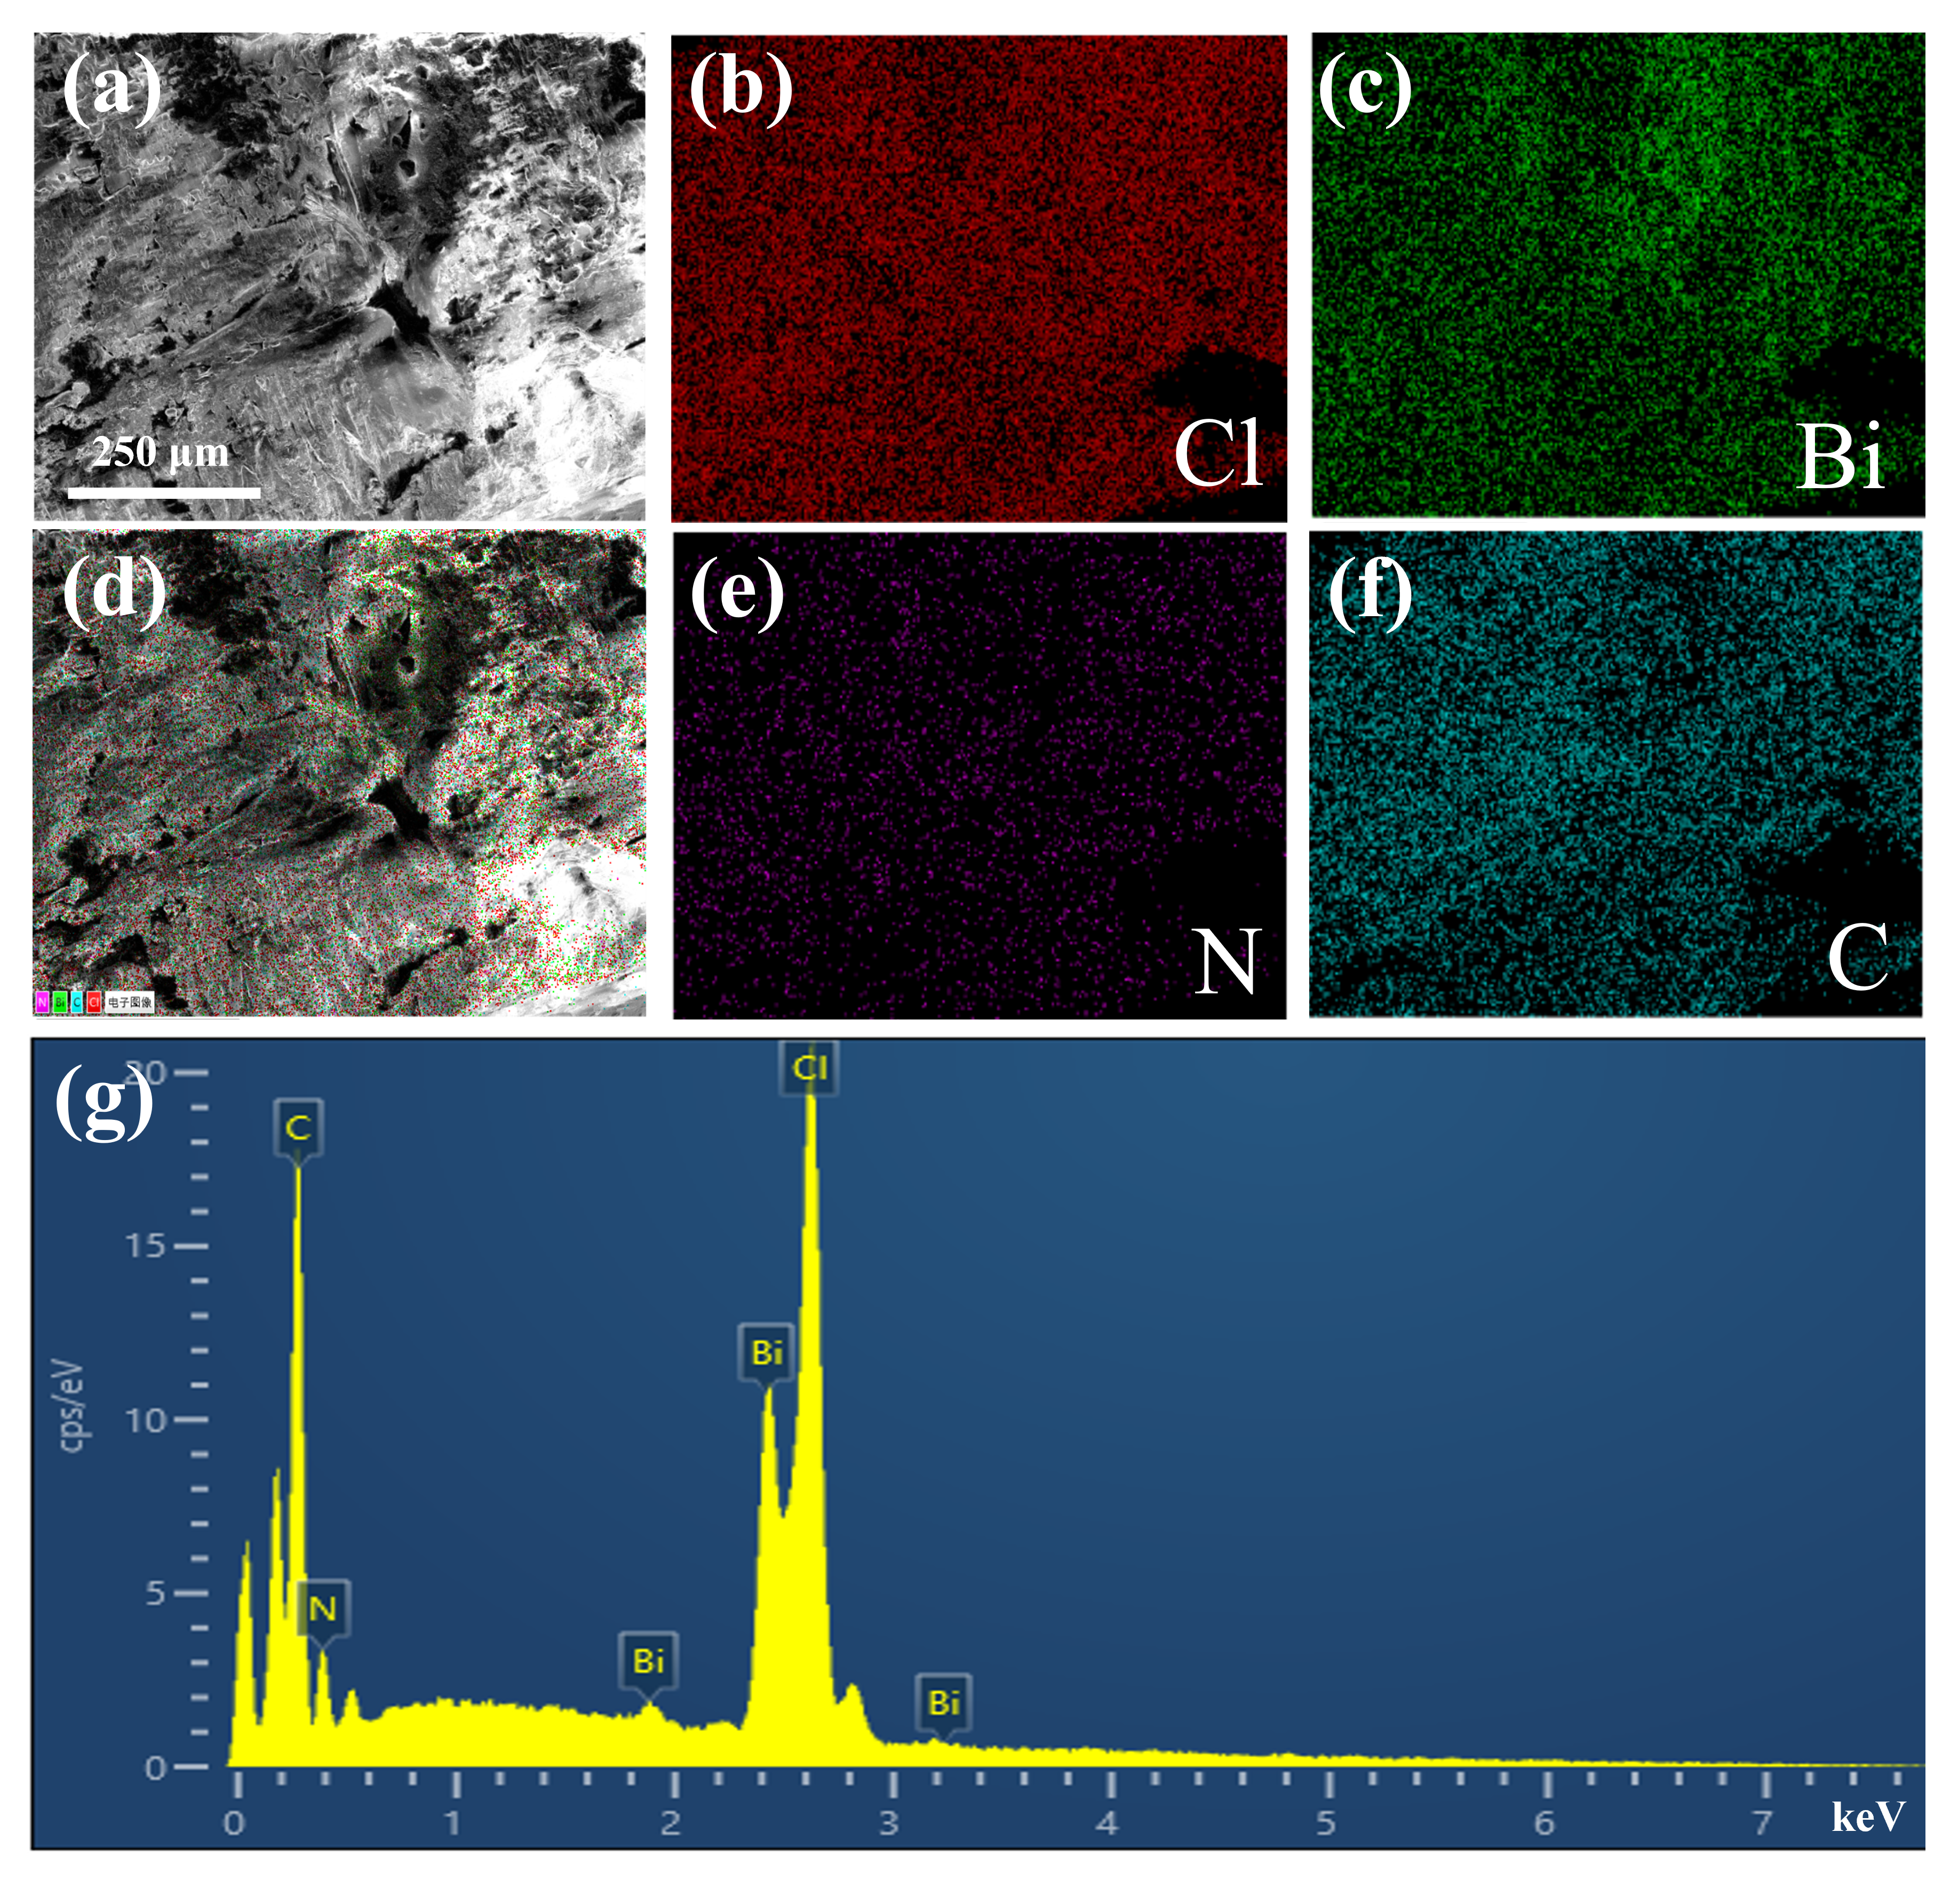
**

**Fig S6.** (a-f) The elemental mappings and (g) EDS spectrum of (C6H14N)2BiCl5.


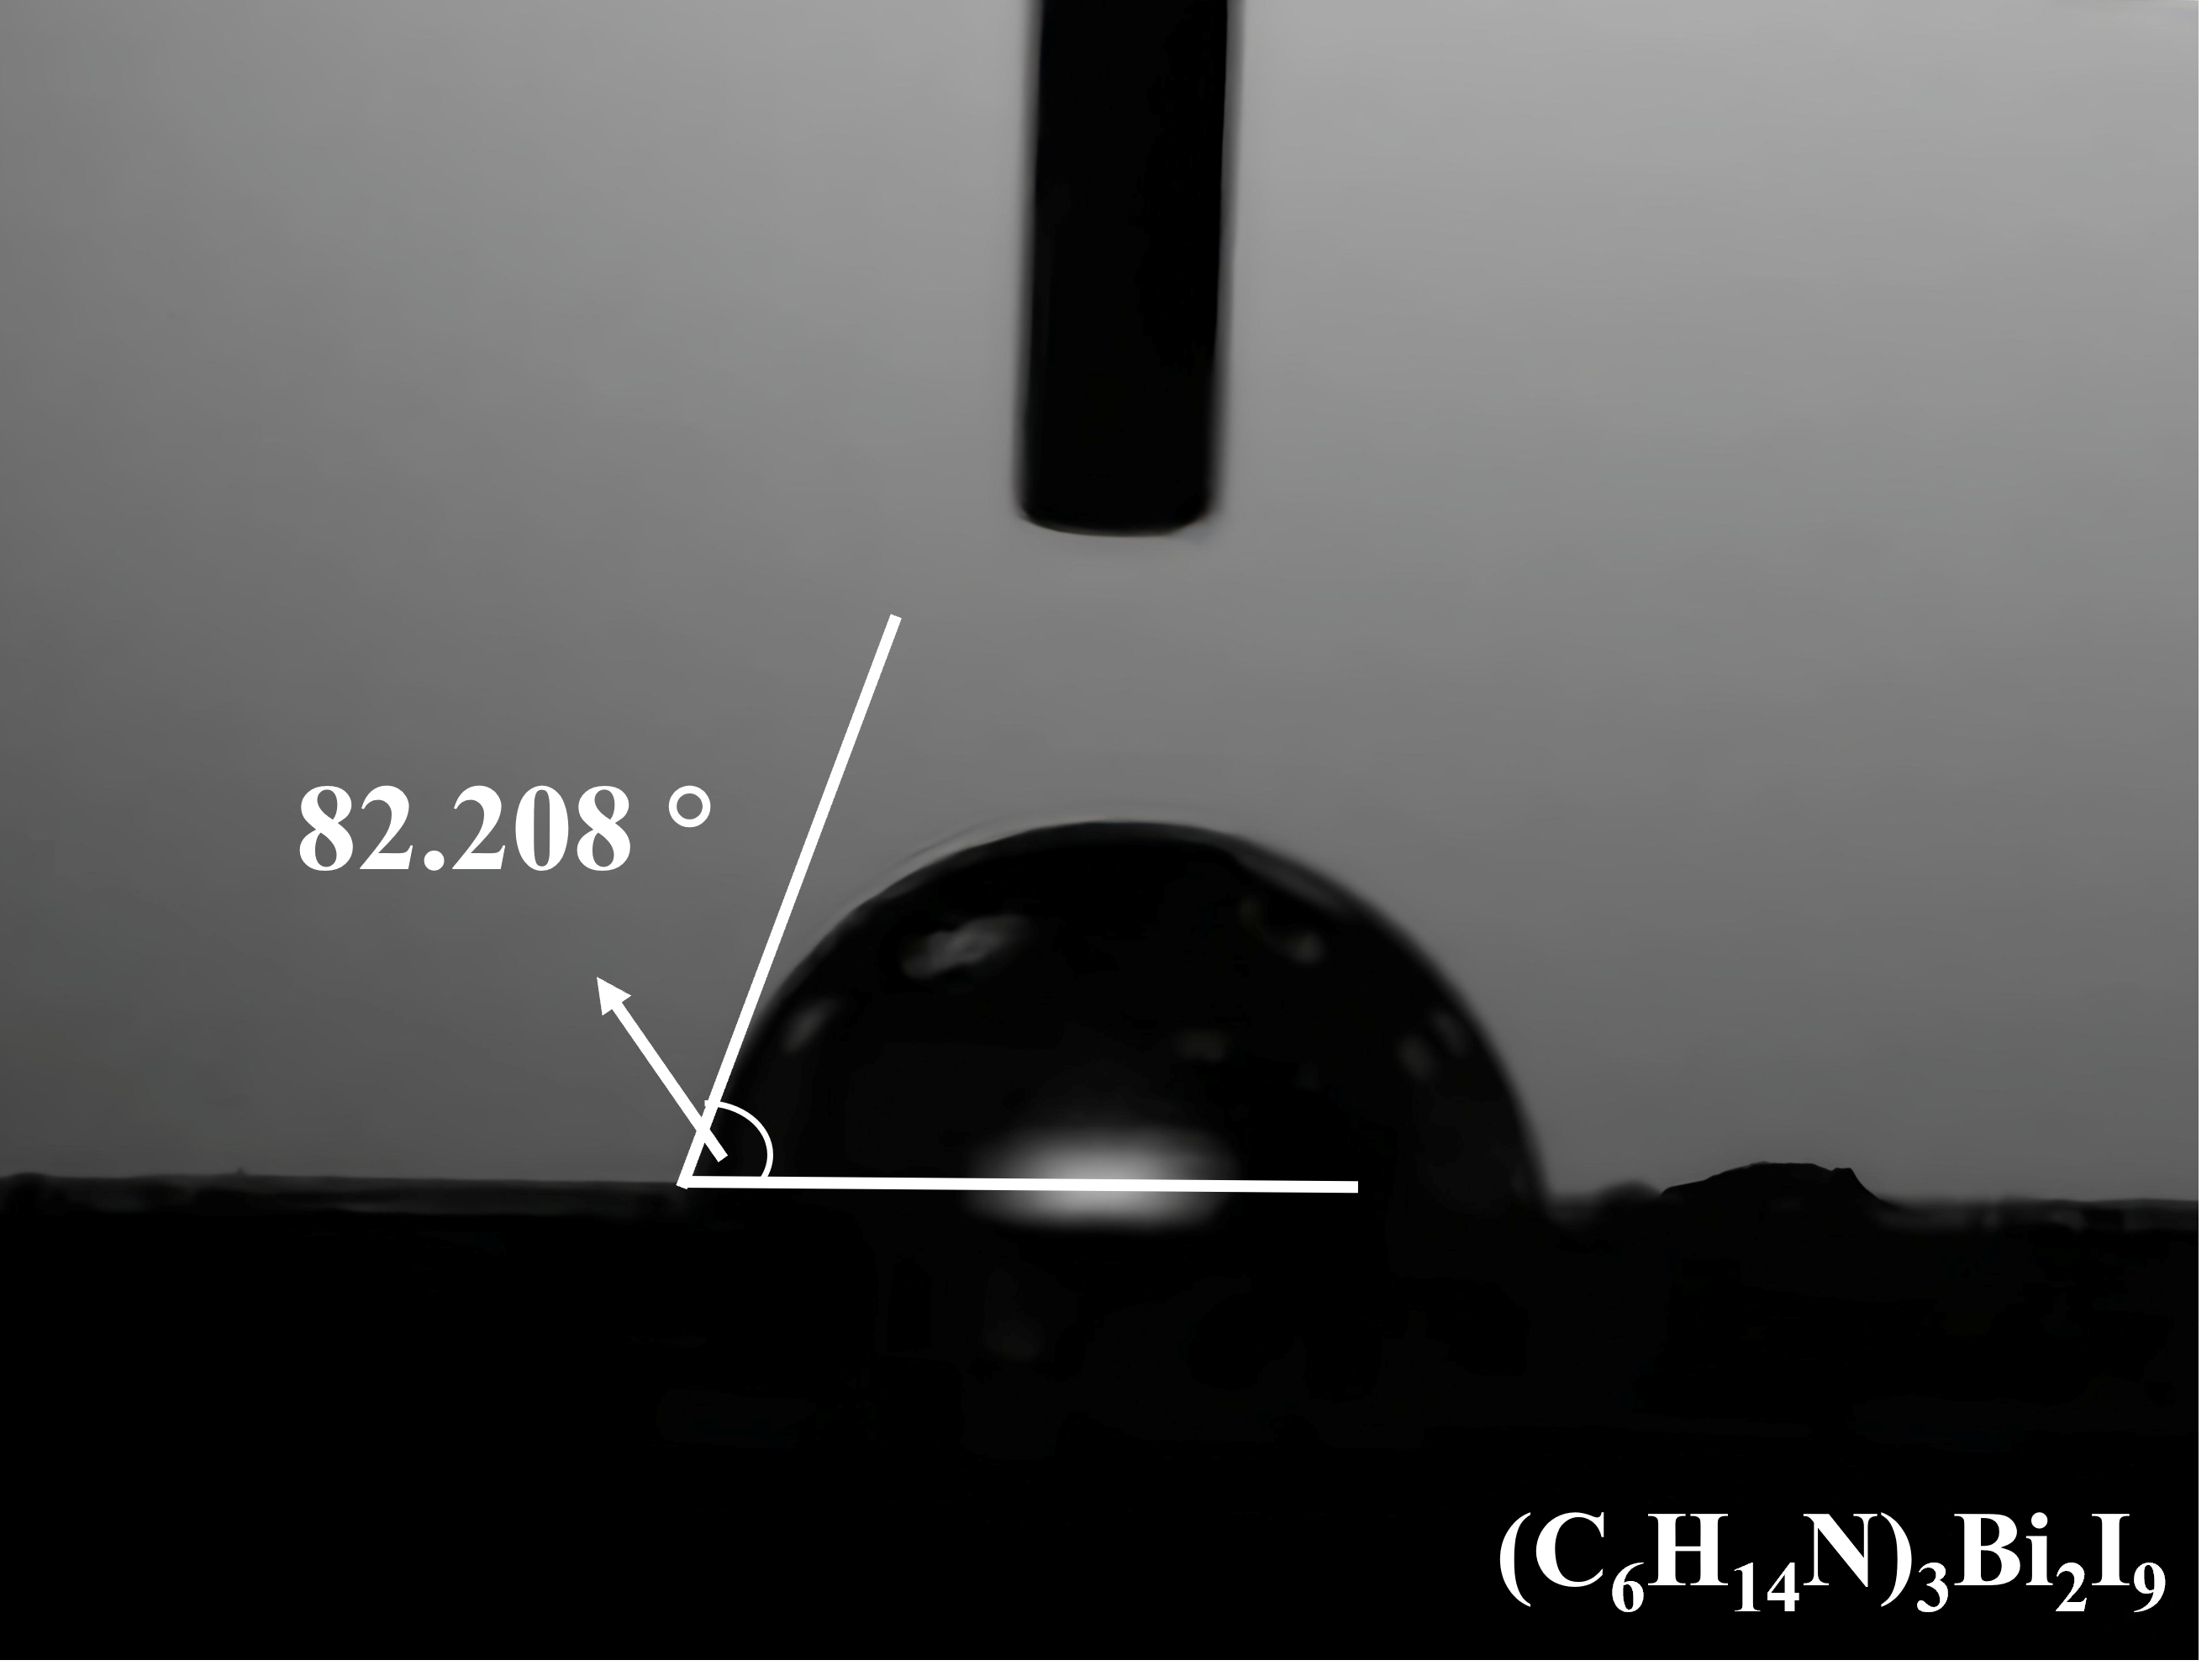


**Fig S7.** Contact angle image of (C6H14N)3Bi2I9 single rystal.





**Fig S8.** Attenuation efficiency of 40 keV X-ray photons for (C6H14N)3Bi2I9, (C6H14N)2BiBr5, (C6H14N)2BiCl5, Si, α-Se and CdTe.

**
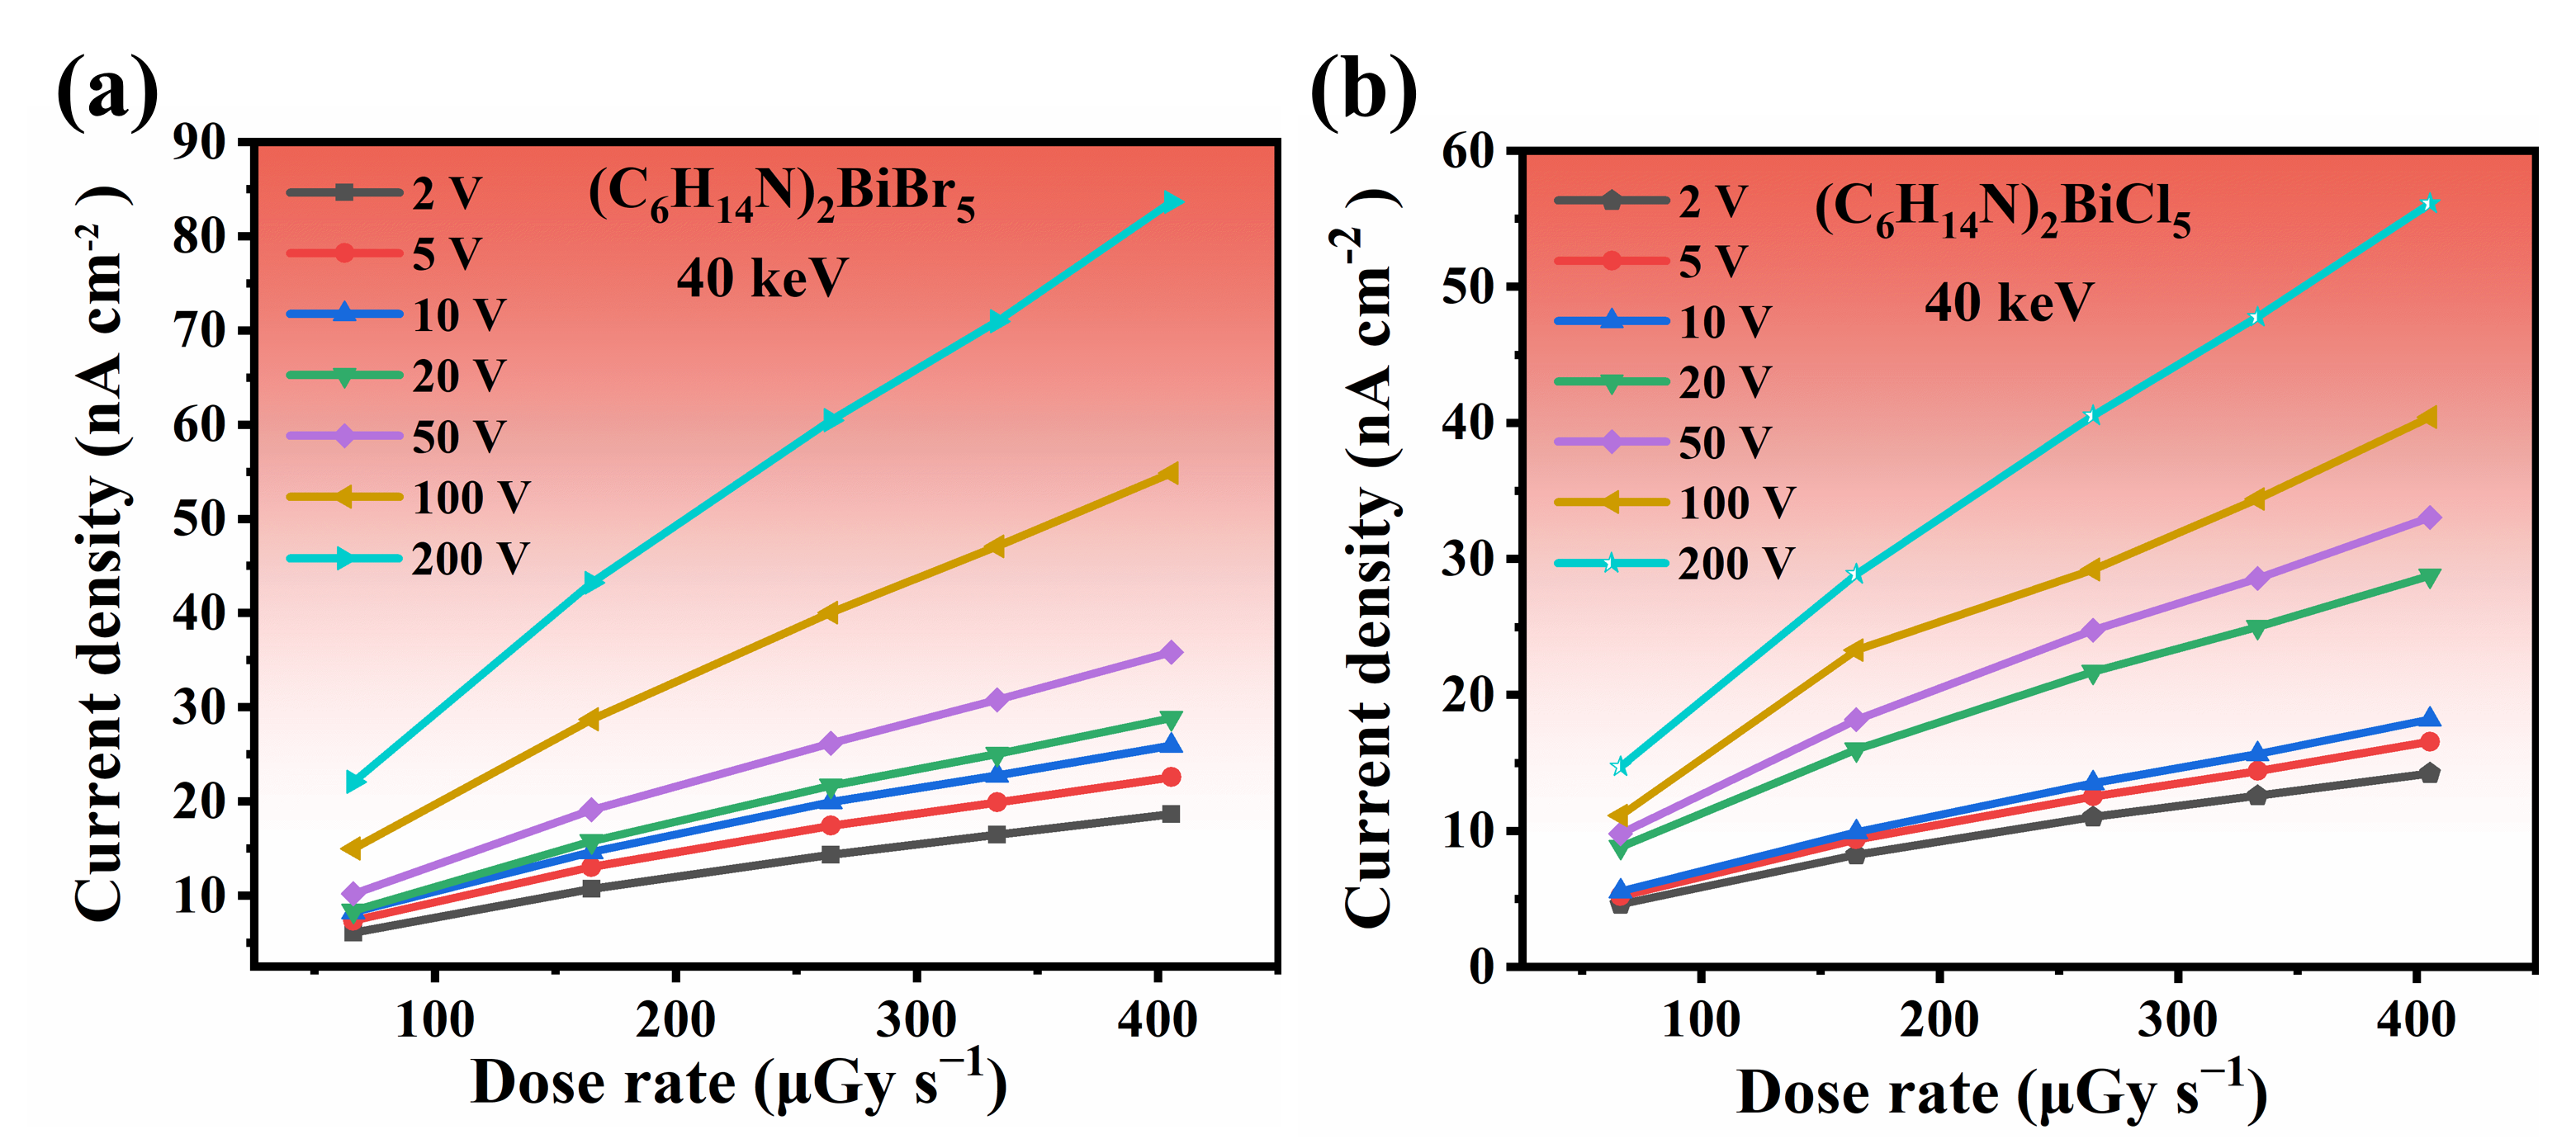
**

**Fig S9.** The photocurrent densities as a function of X-ray dose rates under different bias voltages for (a) (C6H14N)2BiBr5 and (b) (C6H14N)2BiCl5.

**
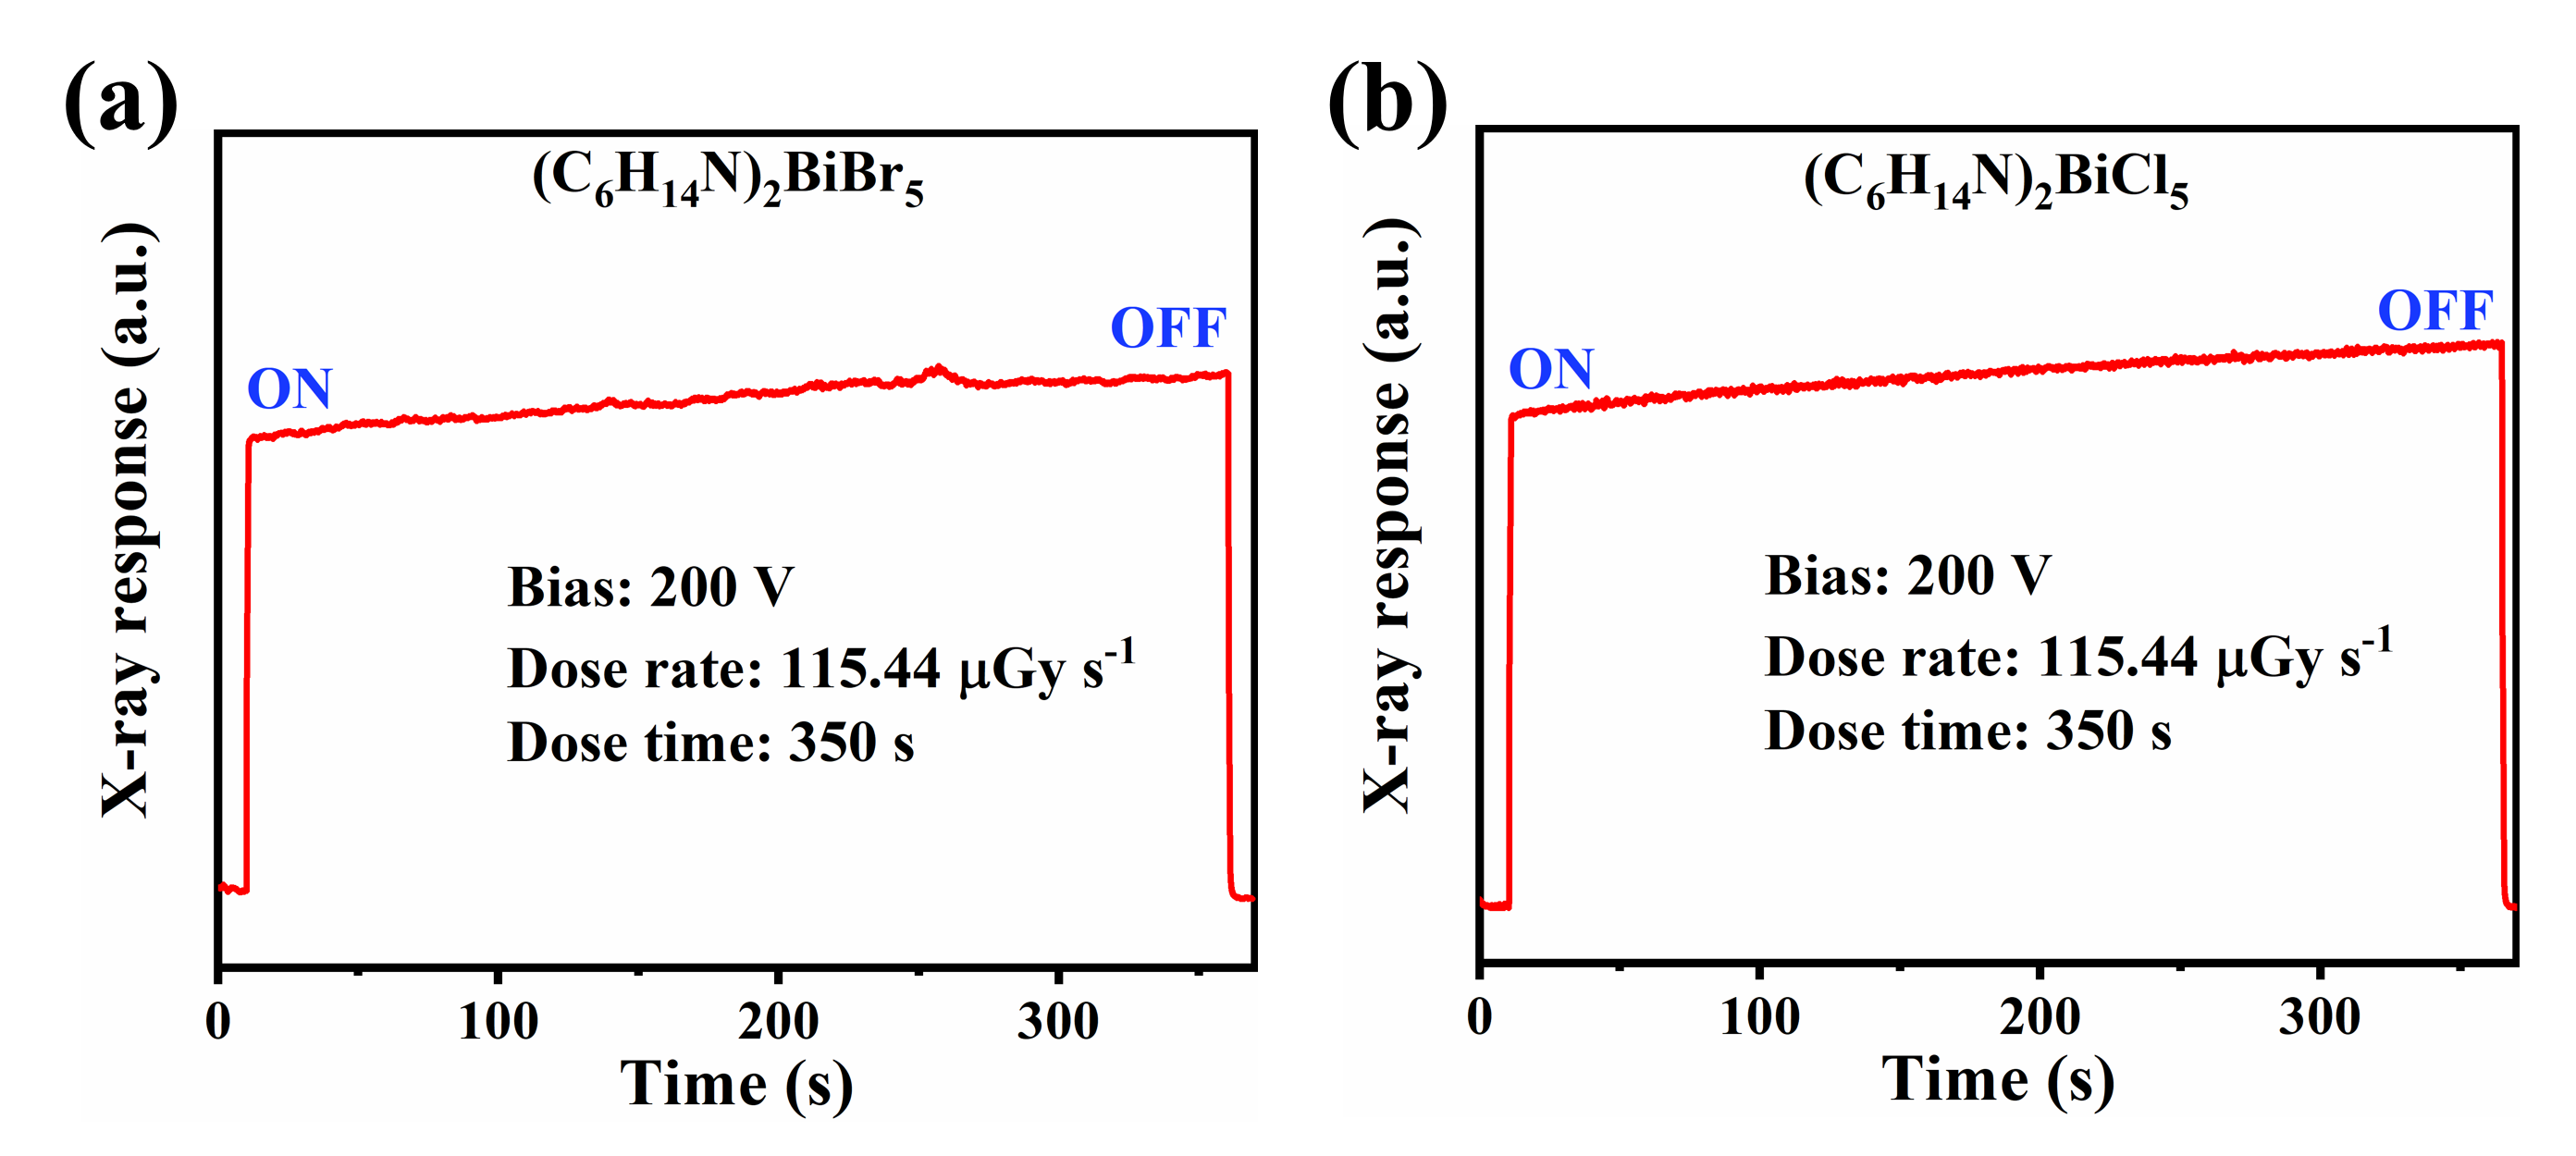
**

**Fig S10.** Photocurrent stability of (a) (C6H14N)2BiBr5 and (b) (C6H14N)2BiCl5.


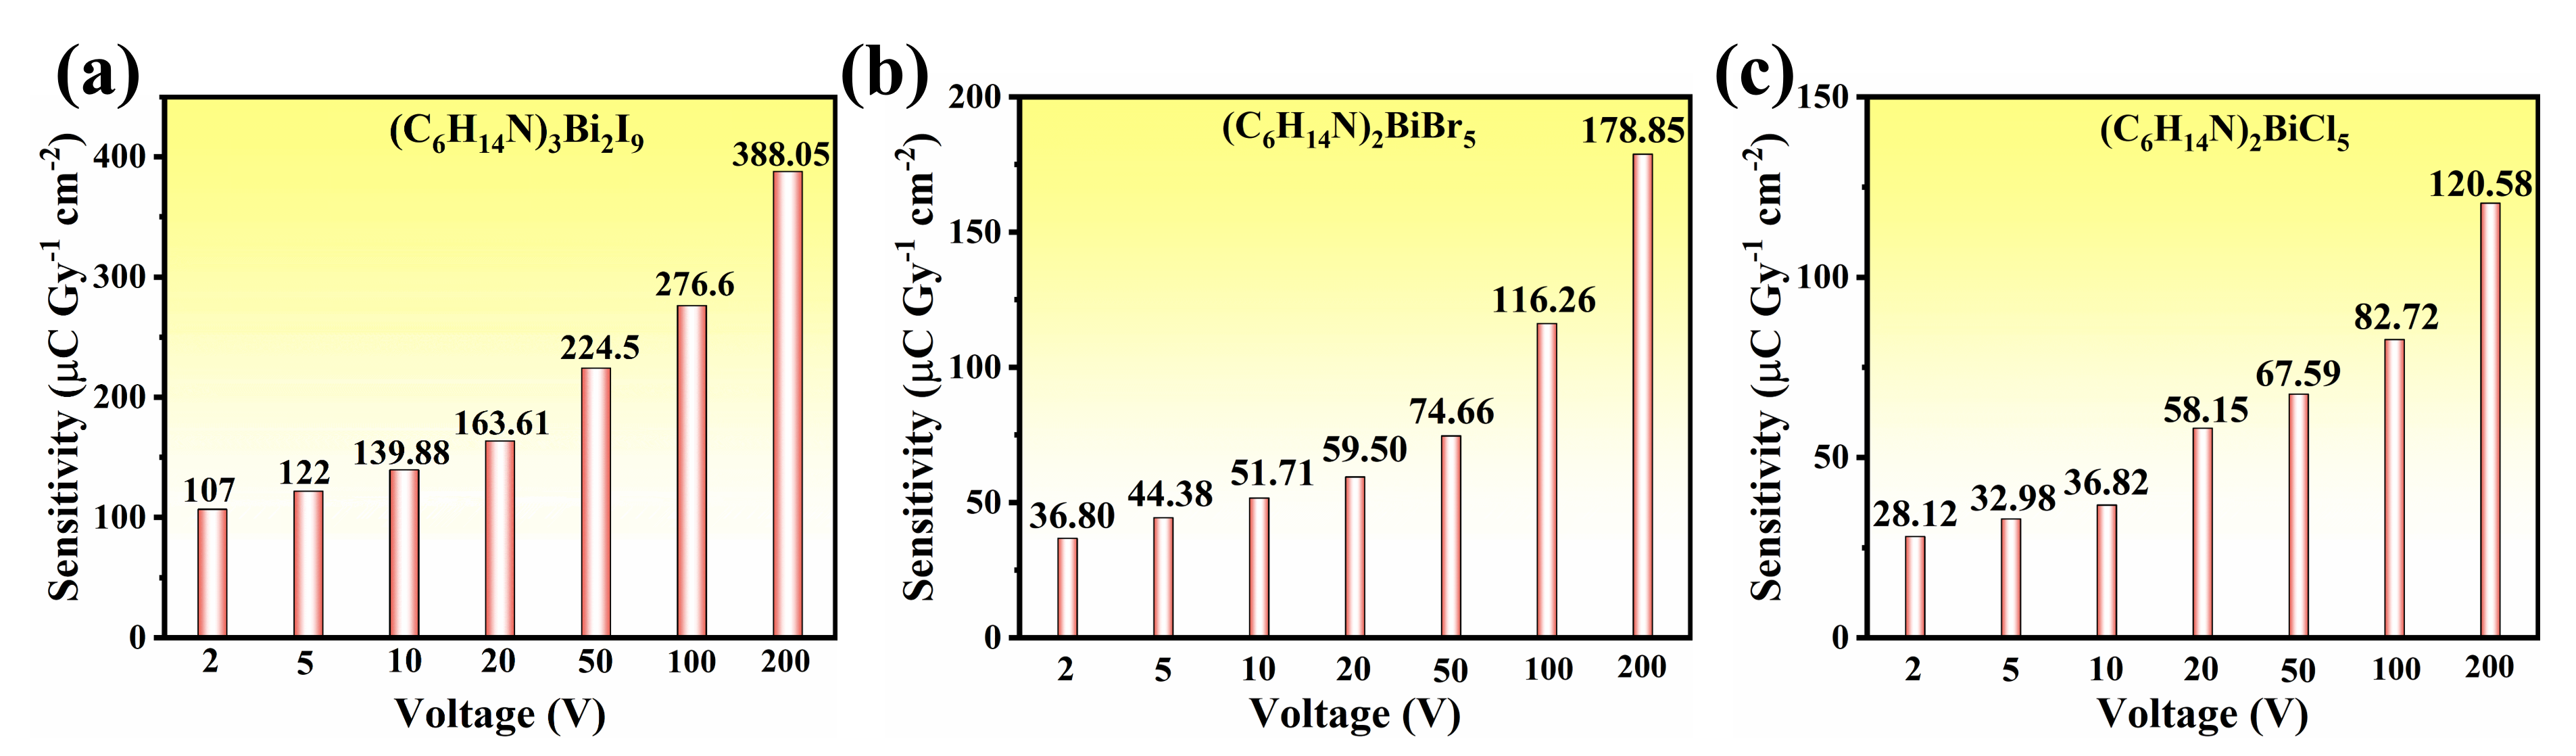


**Fig S11.** The X-ray sensitivity of (a)(C6H14N)3Bi2I9, (b)(C6H14N)2BiBr5, and (c)(C6H14N)2BiCl5.

**
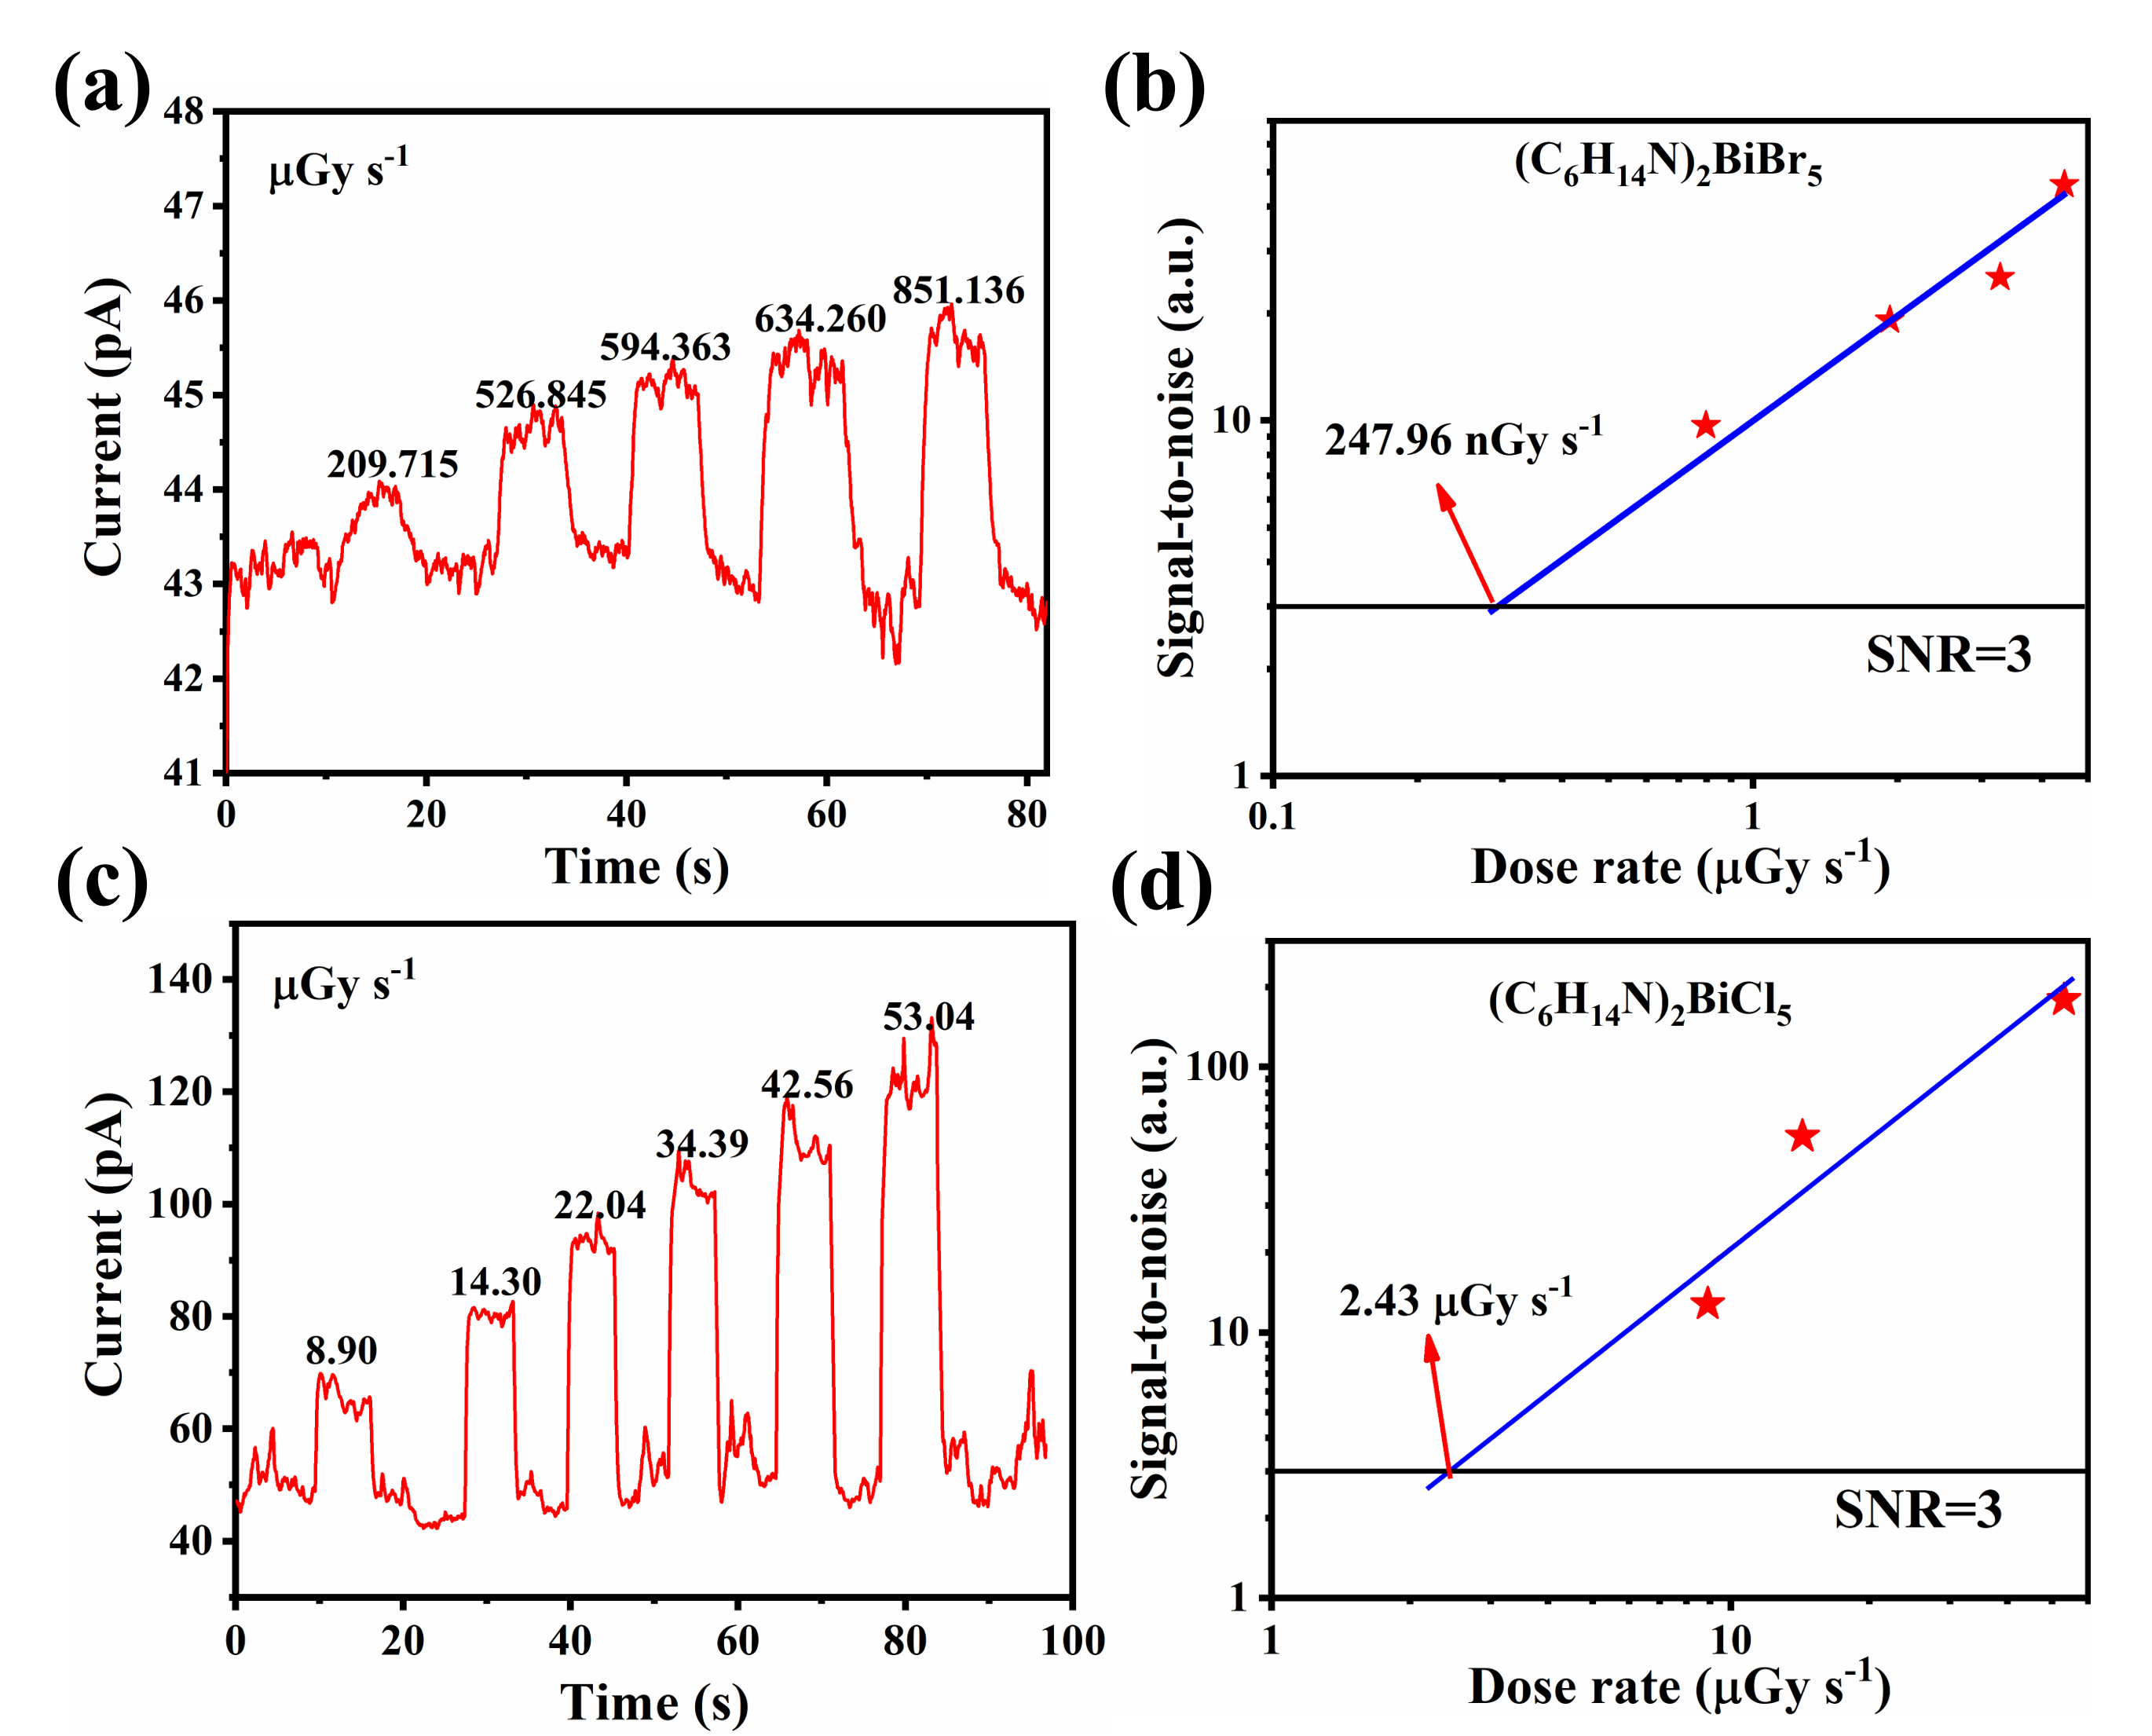
**

**Fig S12.** I-t curve at low dose rates for (a) (C6H14N)2BiBr5 and (c) (C6H14N)2BiCl5-based detectors. Detection limit for (b) (C6H14N)2BiBr5 and (d) (C6H14N)2BiCl5-based detectors at 20 V bias.


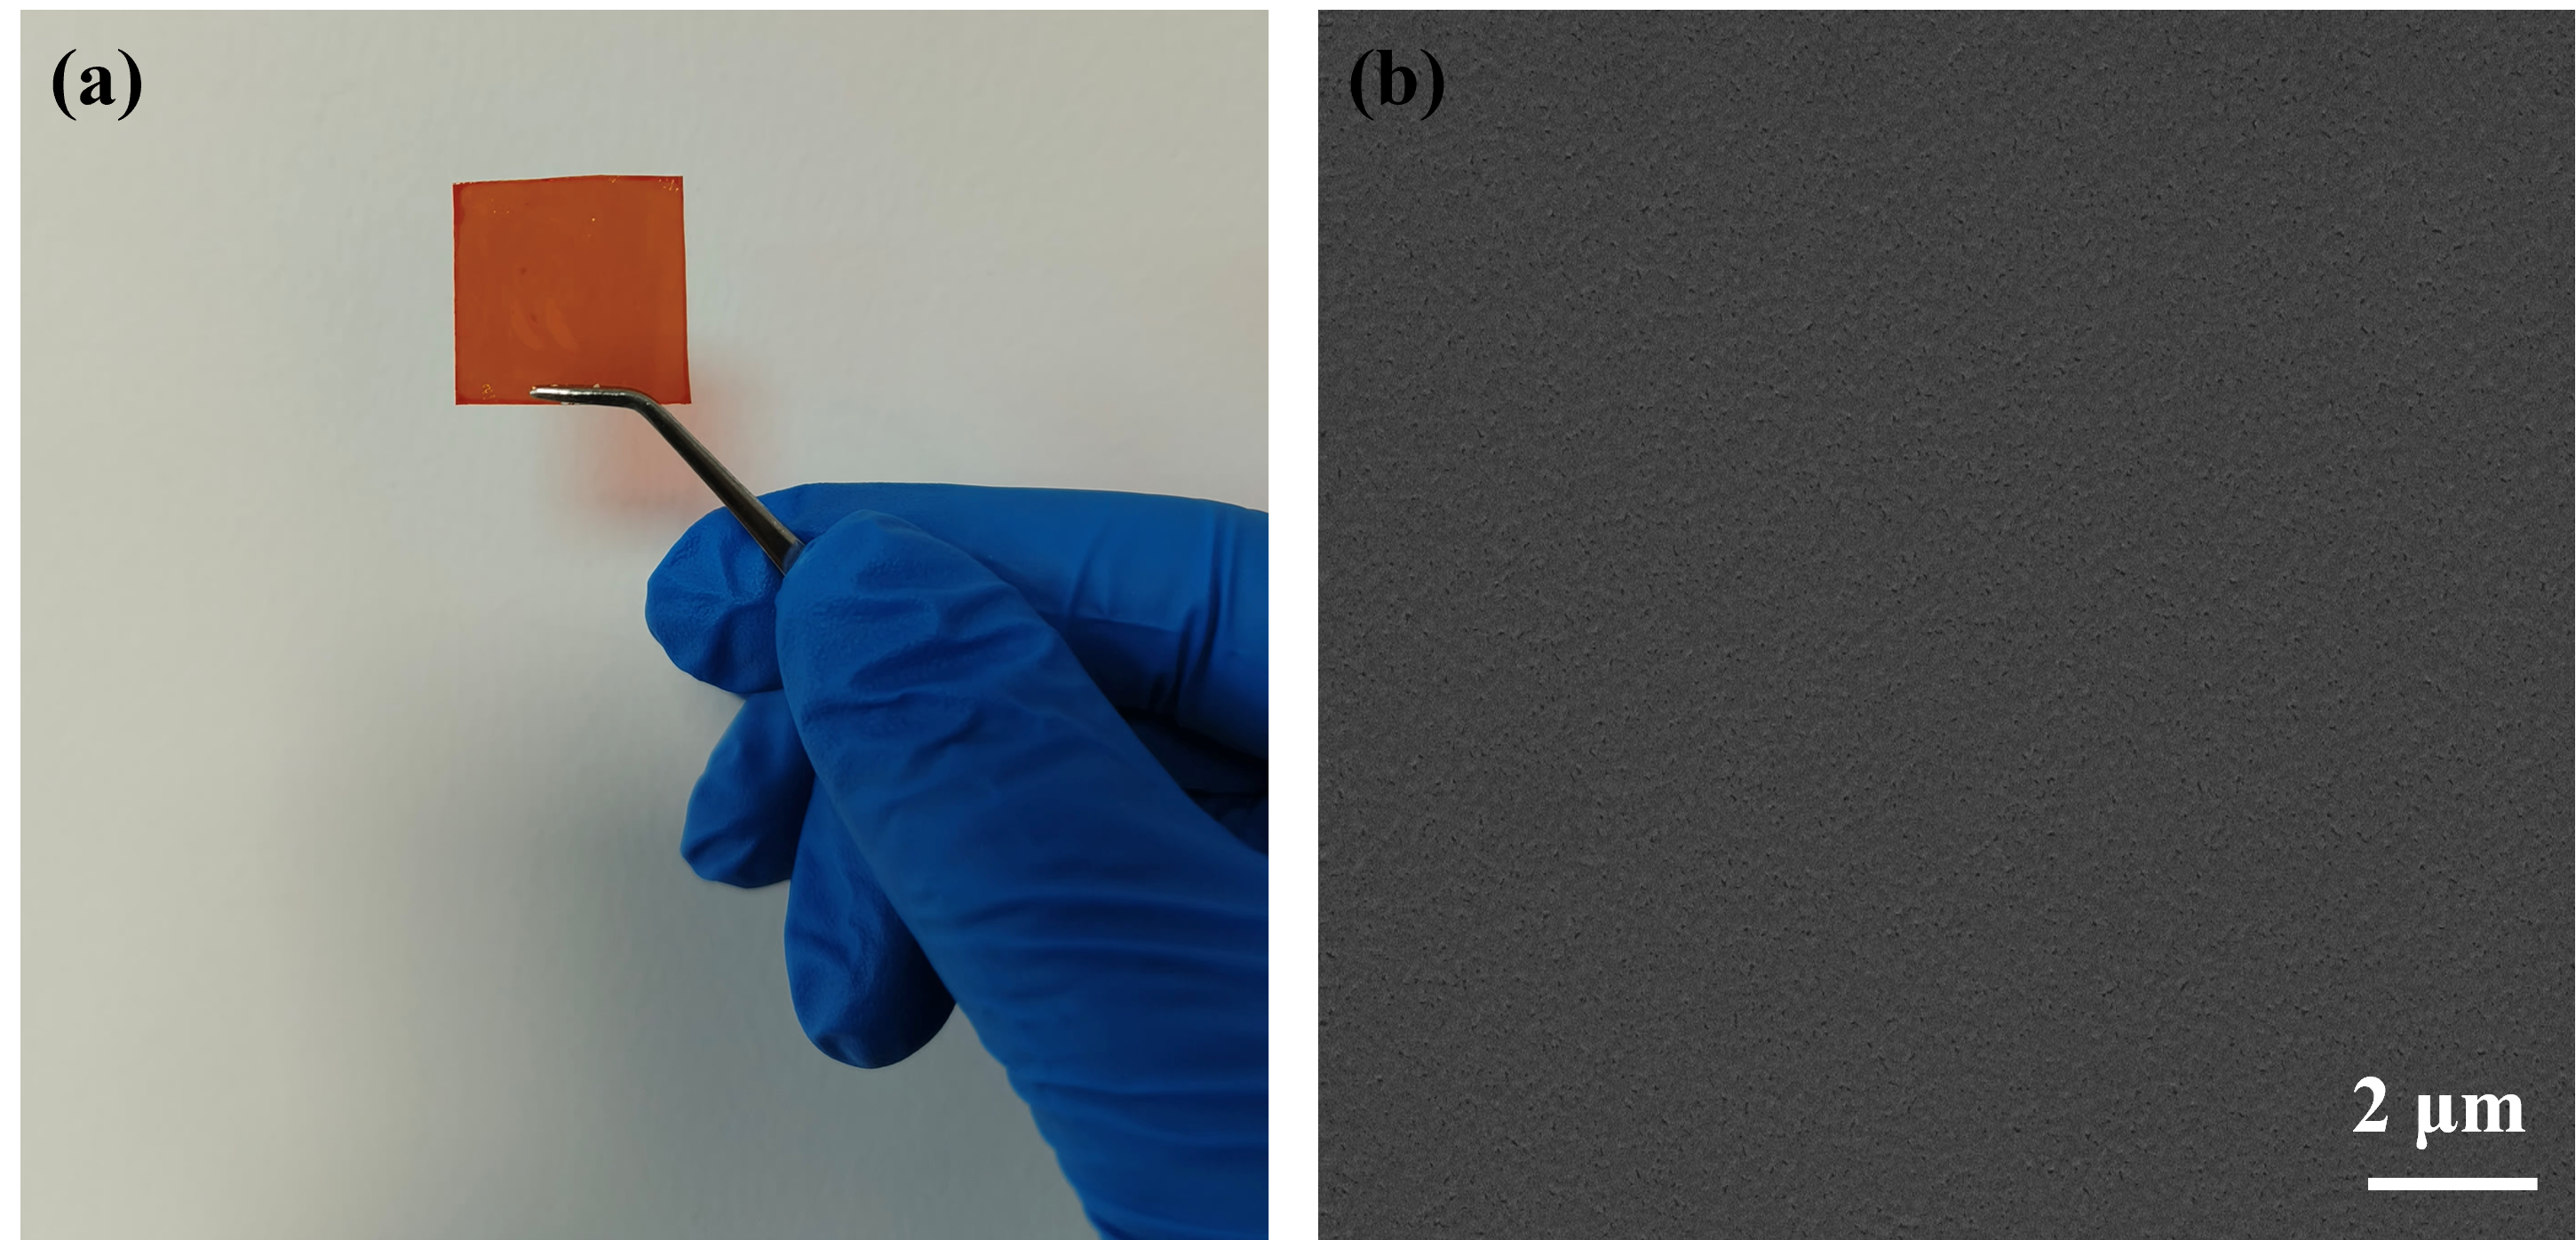


**Fig S13.** (a)The photo and (b) SEM images of (C6H14N)3Bi2I9 flexible film.

**

**

**Fig S14.**The X-ray sensitivity of (C6H14N)3Bi2I9 flexible film.

**

**

**Fig S15.** I-t curve at low dose rates for (C6H14N)3Bi2I9 flexible film.

**Table S1.** Crystal data of (C6H14N)3Bi2I9, (C6H14N)2BiBr5 and(C6H14N)2BiCl5.

| Identification code | 2390230 | 2474810 | 2435695 |
| --- | --- | --- | --- |
| Empirical formula | C18H42N3I9Bi2 | C12H28N2Br5Bi | C12H28N2BiCl5 |
| Formula weight | 1860.27 | 808.89 | 582.56 |
| Temperature/K | 293(2) | 293(2) | 298(2) |
| Crystal system | orthorhombic | orthorhombic | orthorhombic |
| Space group | Pnma | Pna21 | Pnma |
| a/Å | 21.3111(13) | 12.788(2) | 12.5532(6) |
| b/Å | 8.6398(5) | 22.184(4) | 7.5630(4) |
| c/Å | 22.5231(12) | 7.8600(12) | 21.7609(11) |
| α/° | 90 | 90 | 90 |
| β/° | 90 | 90 | 90 |
| γ/° | 90 | 90 | 90 |
| Volume/Å3 | 4147.0(4) | 2229.8(6) | 2065.98(18) |
| Z | 4 | 4 | 4 |
| ρcalcg/cm3 | 2.912 | 2.410 | 1.873 |
| μ/mm‑1 | 15.185 | 16.861 | 9.174 |
| F(000) | 3088.0 | 1488.0 | 1112.0 |
| Radiation | MoKα (λ = 0.71073) | MoKα (λ = 0.71073) | MoKα (λ = 0.71073) |
| 2Θ range for data collection/° | 3.822 to 49.994 | 4.862 to 50.728 | 5.702 to 50.686 |
| Index ranges | -25 ≤ h ≤ 24， -9 ≤ k ≤ 10, -26 ≤ l ≤ 26 | -15 ≤ h ≤ 15, -26 ≤ k ≤ 23, --8 ≤ l ≤ 9 | -15 ≤ h ≤ 15, -7 ≤ k ≤ 9, -22 ≤ l ≤ 26 |
| Reflections collected | 27553 | 17876 | 11792 |
| Independent reflections | 3909 [Rint = 0.0688, Rsigma = 0.0399] | 3686 [Rint = 0.0511, Rsigma = 0.0447] | 2016 [Rint = 0.0285, Rsigma = 0.0244] |
| Data/restraints/parameters | 3909/191/248 | 3686/1/182 | 2016/84/129 |
| Goodness-of-fit on F2 | 1.043 | 1.101 | 1.221 |
| Final R indexes [I>=2σ (I)] | R1 = 0.0553, wR2 = 0.1388 | R1 = 0.0297, wR2 = 0.0636 | R1 = 0.0396, wR2 = 0.1041 |
| Final R indexes [all data] | R1 = 0.0666, wR2 = 0.1458 | R1 = 0.0331, wR2 = 0.0654 | R1 = 0.0428, wR2 = 0.1054 |
| Largest diff. peak/hole / e Å-3 | 3.02/-1.35 | 1.46/-0.70 | 1.03/-1.50 |

**Table S2.** Bond lengths and bond angles of (C6H13N)3Bi2I9.

| **Atom-Atom** | **Length/Å** | **Atom-Atom** | **Length/Å** |
| --- | --- | --- | --- |
| Bi2-I5 | 2.9371(16) | Bi2-I41 | 2.8949(12) |
| Bi2-I3 | 3.3512(16) | Bi1-I3 | 3.2446(16) |
| Bi2-I0051 | 3.3939(11) | Bi1-I0051 | 3.1337(10) |
| Bi2-I005 | 3.3940(11) | Bi1-I005 | 3.1337(10) |
| Bi2-I4 | 2.8949(12) | Bi1-I1 | 2.9505(17) |
| Bi1-I2 | 2.9940(11) | Bi1-I21 | 2.9940(11) |
| **Atom-Atom-Atom** | **Angle/°** | **Atom-Atom-Atom** | **Angle/°** |
| I5-Bi2-I3 | 170.65(5) | I0051-Bi1-I3 | 84.34(3) |
| I5-Bi2-I0051 | 94.03(3) | I1-Bi1-I3 | 178.44(5) |
| I5-Bi2-I005 | 94.03(3) | I1-Bi1-I005 | 94.54(4) |
| I3-Bi2-I005 | 78.83(3) | I1-Bi1-I0051 | 94.54(4) |
| I3-Bi2-I0051 | 78.83(3) | I1-Bi1-I2 | 91.00(4) |
| I0051-Bi2-I005 | 79.54(4) | I1-Bi1-I21 | 91.00(4) |
| I41-Bi2-I5 | 92.15(4) | I21-Bi1-I3 | 90.06(4) |
| I4-Bi2-I5 | 92.15(4) | I2-Bi1-I3 | 90.06(4) |
| I4-Bi2-I3 | 94.00(3) | I2-Bi1-I005 | 173.72(4) |
| I41-Bi2-I3 | 94.00(3) | I2-Bi1-I0051 | 88.90(4) |
| I41-Bi2-I0051 | 91.08(3) | I21-Bi1-I005 | 88.90(4) |
| I4-Bi2-I005 | 91.08(3) | I21-Bi1-I0051 | 173.71(4) |
| I4-Bi2-I0051 | 169.09(3) | I21-Bi1-I2 | 93.98(6) |
| I41-Bi2-I005 | 169.09(3) | Bi1-I3-Bi2 | 80.40(4) |
| I4-Bi2-I41 | 97.66(6) | Bi1-I005-Bi2 | 81.40(3) |
| I005-Bi1-I3 | 84.34(3) |  |  |

**Table S3.** Bond lengths and bond angles of (C6H13N)2BiBr5.

| **Atom-Atom** | **Length/Å** | **Atom-Atom** | **Length/Å** |
| --- | --- | --- | --- |
| Bi1-Br2 | 2.8371(11) | Bi1-Br4 | 2.8536(10) |
| Bi1-Br3 | 2.9824(13) | Bi1-Br5 | 2.7638(14) |
| Bi1-Br31 | 3.1387(12) | Bi1-Br6 | 2.7022(12) |
| **Atom-Atom-Atom** | **Angle/°** | **Atom-Atom-Atom** | **Angle/°** |
| Br2-Bi1-Br31 | 90.04(4) | Br4-Bi1-Br3 | 88.66(4) |
| Br2-Bi1-Br3 | 91.10(4) | Br5-Bi1-Br2 | 91.59(4) |
| Br2-Bi1-Br4 | 175.27(4) | Br5-Bi1-Br3 | 175.53(4) |
| Br3-Bi1-Br31 | 82.944(15) | Br5-Bi1-Br31 | 93.48(4) |
| Br4-Bi1-Br31 | 94.61(4) | Br5-Bi1-Br4 | 88.95(4) |
| Br6-Bi1-Br2 | 87.34(4) | Br6-Bi1-Br4 | 87.93(4) |
| Br6-Bi1-Br31 | 171.07(4) | Br6-Bi1-Br5 | 95.13(4) |
| Br6-Bi1-Br3 | 88.56(5) | Bi1-Br3-Bi12 | 155.19(5) |

**Table S4.** Bond lengths and bond angles of (C6H13N)2BiCl5.

| **Atom-Atom** | **Length/Å** | **Atom-Atom** | **Length/Å** |
| --- | --- | --- | --- |
| Bi1-Cl2 | 2.696(4) | Bi1-Cl1 | 2.813(5) |
| Bi1-Cl3 | 2.677(4) | Bi1-Cl5 | 2.638(6) |
| Bi1-Cl11 | 3.042(5) | Bi1-Cl4 | 2.532(6) |
| **Atom-Atom-Atom** | **Angle/°** | **Atom-Atom-Atom** | **Angle/°** |
| Cl2-Bi1-Cl11 | 89.39(13) | Cl5-Bi1-Cl3 | 88.34(15) |
| Cl2-Bi1-Cl1 | 89.39(12) | Cl5-Bi1-Cl1 | 176.64(19) |
| Cl2-Bi1-Cl2 | 175.28(4) | Cl5-Bi1-Cl11 | 68.99(19) |
| Cl3-Bi1-Cl2 | 174.38(12) | Cl4-Bi1-Cl2 | 87.27(16) |
| Cl3-Bi1-Cl1 | 93.89(13) | Cl4-Bi1-Cl3 | 88.29(16) |
| Cl3-Bi1-Cl11 | 93.89(13) | Cl4-Bi1-Cl11 | 87.9(2) |
| Cl11-Bi1-Cl1 | 108.3(2) | Cl4-Bi1-Cl1 | 163.46(19) |
| Cl5-Bi1-Cl2 | 88.59(15) | Bi1-Cl1-Bi11 | 154.9(2) |

**Table S5.** Some Literature-Reported dark current drift of Perovskite Single Crystals.

| **Material** | **Dark current drift**  **(nAcm-1s-1V-1)** | **Refs.** |
| --- | --- | --- |
| (BZA)2(MA)Pb2Br | 3.9×10-6 | [1] |
| MhyPbBr3 | 5.77×10-5 | [2] |
| MAPbI3/(PEA)2PbBr4/MAPbI3 | 2.5×10-9 | [3] |
| (C6H14N)3Bi2I9 | 2.16×10⁻8 | This work |

**Table S6.** Some Literature-Reported Sensitivity and Detection Limits of Bismuth-Based Perovskite Single Crystals.

| **Material** | **Sensitivity**  **(μC Gy⁻¹ cm⁻²)** | **Detection limit**  **(nGy s⁻¹)** | **Refs.** |
| --- | --- | --- | --- |
| Rb3Bi2I9 | 159.7 | 8.32 | [4] |
| (Gua)3Bi2I9 | 18.23 | 237.54 | [5] |
| (FPEA)4AgBiBr8 | 27 | 7200 | [6] |
| (DFPIP)4AgBiI8 | 188 | 3130 | [7] |
| Cs3Bi2Br9 | 230.4 | - | [8] |
| (BA)2CsAgBiBr7 | 4.2 | - | [9] |
| (CPA)4AgBiBr8 | 0.8 | - | [10] |
| (C6H13N)3Bi2I9 | 388.05 | 79.18 | This work |
| (C6H13N)3BiBr5 | 178.85 | 247.96 | This work |
| (C6H13N)3BiCl5 | 120.58 | 2430 | This work |

**References**

1. J. Li, T. Zhu, H. Ye, Q. Guan, S. You, R. Li, Y. Geng, J. Luo, Small. **21**, 2401545 (2024) Doi:10.1002/smll.202401545

2. Q. Guan, S. You, Z.K. Zhu, R. Li, H. Ye, C. Zhang, H. Li, C. Ji, X. Liu, J. Luo, Angew. Chem. Int. Edit. **63**, e202320180 (2024) Doi:10.1002/anie.202320180

3. Z. Zhao, J. Hao, B. Jia, D. Chu, J. Pi, Y. Zhang, S. Zai, Y. Liang, Y. Li, Z. Feng, X. Zheng, M. Wei, L. Zhao, R. Shi, S.F. Liu, Y. Liu, ACS Energy Lett. **9**, 2758-2766 (2024) Doi:10.1021/acsenergylett.4c00590

4. M. Xia, J.H. Yuan, G. Niu, X. Du, L. Yin, W. Pan, J. Luo, Z. Li, H. Zhao, K.H. Xue, X. Miao, J. Tang, Adv. Funct. Mater. **30**, 1910648 (2020) Doi:10.1002/adfm.201910648

5. Y. Xu, J. Hu, X. Xiao, H. He, G. Tong, J. Chen, Y. He, Inorg. Chem. Front. **9**, 494-500 (2022) Doi:10.1039/d1qi01049b

6. M. Ge, S. Chen, X. Fu, Y. Feng, D. Wang, M. Yuan, J. Phys. Chem. C. **126**, 19417-19423 (2022) Doi:10.1021/acs.jpcc.2c05442

7. C.F. Wang, H. Li, M.G. Li, Y. Cui, X. Song, Q.W. Wang, J.Y. Jiang, M.M. Hua, Q. Xu, K. Zhao, H.Y. Ye, Y. Zhang, Adv. Funct. Mater. **31**, 2009457 (2021) Doi:10.1002/adfm.202009457

8. X. Li, X. Du, P. Zhang, Y. Hua, L. Liu, G. Niu, G. Zhang, J. Tang, X. Tao, Sci. China Mater. **64**, 1427-1436 (2021) Doi:10.1007/s40843-020-1553-8

9. Z. Xu, X. Liu, Y. Li, X. Liu, T. Yang, C. Ji, S. Han, Y. Xu, J. Luo, Z. Sun, Angew. Chem. Int. Edit. **58**, 15757-15761 (2019) Doi:10.1002/anie.201909815

10. W. Guo, X. Liu, S. Han, Y. Liu, Z. Xu, M. Hong, J. Luo, Z. Sun, Angew. Chem. Int. Edit. **59**, 13879-13884 (2020) Doi:10.1002/anie.202004235
